# Supplementary material for: Mutational signatures and increased retrotransposon insertions in Xeroderma Pigmentosum variant skin tumors
Source: bioRxiv or medRxiv preprint supplement (doi:10.1101/2022.07.28.22277756), 2022-08-01
Supplement: Supplementary file [file media-2.pdf]

Supplementary Table 4

| INDEL size<br>(bp) | Tumor  |          |          |          |          |          |          |        |        |          |          | Total |
|--------------------|--------|----------|----------|----------|----------|----------|----------|--------|--------|----------|----------|-------|
|                    | XP03GO | XP06GO_1 | XP06GO_2 | XP06GO_3 | XP06GO_4 | XP52GO_1 | XP52GO_2 | XP11GO | XP45GO | XP85GO_1 | XP85GO_2 |       |
| 1                  | 31     | 73       | 111      | 29       | 26       | 65       | 44       | 53     | 68     | 36       | 74       | 610   |
| 2                  | 7      | 15       | 14       | 6        | 5        | 7        | 20       | 6      | 12     | 3        | 9        | 104   |
| 3                  | 5      | 5        | 12       | 4        | 2        | 4        | 9        | 3      | 6      | 3        | 6        | 59    |
| 4                  | 5      | 3        | 5        | 1        | 4        |          | 5        | 2      | 3      | 3        | 4        | 35    |
| 5                  | 1      | 1        | 2        | 1        | 1        |          | 1        | 1      | 1      | 1        |          | 10    |
| 6                  | 1      |          | 3        |          |          | 1        | 2        |        |        |          | 3        | 10    |
| 7                  | 1      | 1        | 1        | 1        | 1        | 1        | 1        | 2      |        |          | 1        | 10    |
| 8                  |        |          |          |          |          |          | 1        | 1      |        |          | 2        | 4     |
| 10                 | 1      | 1        | 1        | 2        | 2        | 1        | 2        | 2      | 2      |          | 1        | 15    |
| 12                 | 1      |          | 2        |          |          |          |          |        |        | 1        | 1        | 5     |
| 13                 |        | 3        | 2        | 1        | 1        |          |          |        |        | 1        |          | 8     |
| 15                 | 1      |          |          |          |          |          |          |        |        |          |          | 1     |
| 16                 |        | 2        |          | 1        |          |          |          |        |        |          |          | 3     |
| 17                 |        |          | 1        |          |          |          | 1        |        |        |          |          | 2     |
| 18                 | 1      |          |          |          | 1        |          |          |        |        |          |          | 2     |
| 21                 |        |          |          |          |          |          |          |        |        | 1        | 1        | 2     |
| 22                 |        |          |          |          |          |          | 1        |        |        |          |          | 1     |
| 23                 |        |          |          |          |          |          |          | 1      |        |          |          | 1     |
| 24                 |        |          | 1        |          |          |          |          |        |        | 1        | 1        | 3     |
| 25                 |        | 1        | 1        | 1        |          |          |          |        |        | 2        | 1        | 6     |
| 28                 | 1      |          |          |          |          |          |          |        | 1      |          |          | 2     |
| 31                 | 1      |          |          |          |          |          |          |        |        |          |          | 1     |
| 34                 |        |          |          |          |          |          |          | 1      |        |          |          | 1     |
| 35                 |        | 1        |          |          |          |          |          |        |        |          |          | 1     |
| 39                 |        |          | 1        |          |          |          |          |        |        |          |          | 1     |
| 40                 |        | 1        |          |          |          |          |          |        |        |          |          | 1     |
| 43                 |        |          |          |          |          |          |          | 1      |        |          |          | 1     |

|              |    |     |     |    |    |    |    |    |    |    |     |     |
|--------------|----|-----|-----|----|----|----|----|----|----|----|-----|-----|
| 45           |    |     |     |    |    |    |    | 1  |    |    |     | 1   |
| 46           |    |     | 1   |    |    |    |    |    |    |    |     | 1   |
| 47           |    |     | 1   |    |    |    |    |    |    |    |     | 1   |
| 51           |    |     |     | 1  |    |    | 1  | 1  |    |    |     | 3   |
| 53           |    |     |     |    | 1  |    |    |    |    |    |     | 1   |
| 55           |    |     |     |    |    |    |    | 1  |    |    |     | 1   |
| 60           |    |     |     |    | 1  |    |    |    |    |    |     | 1   |
| 70           | 1  |     |     | 1  | 1  |    |    |    |    |    | 1   | 4   |
| 73           |    |     |     |    |    |    |    |    |    | 1  |     | 1   |
| 74           |    |     |     |    | 1  |    |    |    |    |    |     | 1   |
| 76           |    |     |     |    |    |    |    |    |    | 1  |     | 1   |
| <b>Total</b> | 57 | 108 | 159 | 49 | 47 | 79 | 88 | 76 | 93 | 54 | 105 | 915 |

**Supplementary Table 5**

| <b>Sample</b> | <b>Chr</b> | <b>Start</b> | <b>Class</b> | <b>Polimorphic</b> |
|---------------|------------|--------------|--------------|--------------------|
| XP03GO        | chr1       | 20618244     | MEI-Alu      | yes                |
| XP03GO        | chr15      | 76800144     | MEI-Alu      | yes                |
| XP03GO        | chr18      | 9401405      | MEI-Alu      | yes                |
| XP03GO        | chr4       | 186172333    | MEI-Alu      | yes                |
| XP03GO        | chr8       | 41946763     | MEI-Alu      | yes                |
| XP03GO        | chr1       | 21424735     | MEI-Alu      | yes                |
| XP03GO        | chr1       | 92701962     | MEI-Alu      | yes                |
| XP03GO        | chr11      | 106299754    | MEI-Alu      | yes                |
| XP03GO        | chr11      | 428014       | MEI-Alu      | yes                |
| XP03GO        | chr13      | 21320625     | MEI-Alu      | yes                |
| XP03GO        | chr14      | 44544896     | MEI-Alu      | yes                |
| XP03GO        | chr17      | 32572168     | MEI-Alu      | yes                |
| XP03GO        | chr18      | 76241969     | MEI-Alu      | yes                |
| XP03GO        | chr19      | 52384817     | MEI-Alu      | yes                |
| XP03GO        | chr4       | 178277157    | MEI-Alu      | yes                |
| XP03GO        | chr4       | 185440770    | MEI-Alu      | yes                |
| XP03GO        | chr4       | 185460992    | MEI-Alu      | yes                |
| XP03GO        | chr5       | 170774335    | MEI-Alu      | yes                |
| XP03GO        | chr5       | 73037329     | MEI-Alu      | yes                |
| XP03GO        | chr5       | 95658505     | MEI-Alu      | yes                |
| XP03GO        | chr7       | 38169597     | MEI-Alu      | yes                |
| XP06GO        | chr1       | 92701962     | MEI-Alu      | yes                |
| XP06GO        | chr10      | 6229164      | MEI-Alu      | yes                |
| XP06GO        | chr11      | 104274020    | MEI-Alu      | yes                |
| XP06GO        | chr11      | 428014       | MEI-Alu      | yes                |
| XP06GO        | chr11      | 43855889     | MEI-Alu      | yes                |
| XP06GO        | chr13      | 21320625     | MEI-Alu      | yes                |
| XP06GO        | chr17      | 63488529     | MEI-Alu      | yes                |
| XP06GO        | chr18      | 9401405      | MEI-Alu      | yes                |
| XP06GO        | chr19      | 41807206     | MEI-Alu      | yes                |
| XP06GO        | chr19      | 52384817     | MEI-Alu      | yes                |
| XP06GO        | chr22      | 17224400     | MEI-Alu      | yes                |
| XP06GO        | chr3       | 121885667    | MEI-Alu      | yes                |
| XP06GO        | chr4       | 185440770    | MEI-Alu      | yes                |
| XP06GO        | chr4       | 185460992    | MEI-Alu      | yes                |
| XP06GO        | chr8       | 119788552    | MEI-Alu      | yes                |
| XP06GO        | chrX       | 53215274     | MEI-Alu      | yes                |
| XP06GO        | chr13      | 21956223     | MEI-Alu      | yes                |
| XP06GO        | chr2       | 207607677    | MEI-Alu      | yes                |
| XP06GO        | chr15      | 40808120     | MEI-Alu      | yes                |
| XP06GO        | chr20      | 29885844     | MEI-Alu      | yes                |

|        |       |           |         |     |
|--------|-------|-----------|---------|-----|
| XP06GO | chr17 | 80082249  | MEI-Alu | yes |
| XP06GO | chr5  | 1812526   | MEI-Alu | yes |
| XP06GO | chr12 | 63236703  | MEI-Alu | yes |
| XP11GO | chr1  | 21424735  | MEI-Alu | yes |
| XP11GO | chr10 | 53046195  | MEI-Alu | yes |
| XP11GO | chr11 | 428014    | MEI-Alu | yes |
| XP11GO | chr13 | 38878403  | MEI-Alu | yes |
| XP11GO | chr14 | 102562102 | MEI-Alu | yes |
| XP11GO | chr15 | 76800144  | MEI-Alu | yes |
| XP11GO | chr15 | 94345318  | MEI-Alu | yes |
| XP11GO | chr17 | 63488529  | MEI-Alu | yes |
| XP11GO | chr19 | 52384817  | MEI-Alu | yes |
| XP11GO | chr4  | 185440770 | MEI-Alu | yes |
| XP11GO | chr4  | 186172333 | MEI-Alu | yes |
| XP11GO | chr5  | 62561291  | MEI-Alu | yes |
| XP11GO | chr5  | 95658505  | MEI-Alu | yes |
| XP11GO | chr7  | 38169597  | MEI-Alu | yes |
| XP11GO | chr9  | 136768496 | MEI-Alu | yes |
| XP45GO | chr1  | 21424735  | MEI-Alu | yes |
| XP45GO | chr11 | 428014    | MEI-Alu | yes |
| XP45GO | chr13 | 21320625  | MEI-Alu | yes |
| XP45GO | chr15 | 94345318  | MEI-Alu | yes |
| XP45GO | chr19 | 52384817  | MEI-Alu | yes |
| XP45GO | chr19 | 9820429   | MEI-Alu | yes |
| XP45GO | chr3  | 121885667 | MEI-Alu | yes |
| XP45GO | chr4  | 185440770 | MEI-Alu | yes |
| XP45GO | chr5  | 62561291  | MEI-Alu | yes |
| XP45GO | chr5  | 95658505  | MEI-Alu | yes |
| XP45GO | chr8  | 41946763  | MEI-Alu | yes |
| XP52GO | chr11 | 428014    | MEI-Alu | yes |
| XP52GO | chr11 | 43855889  | MEI-Alu | yes |
| XP52GO | chr11 | 7695684   | MEI-Alu | yes |
| XP52GO | chr17 | 63488529  | MEI-Alu | yes |
| XP52GO | chr2  | 137502222 | MEI-Alu | yes |
| XP52GO | chr4  | 185440770 | MEI-Alu | yes |
| XP52GO | chr4  | 185460992 | MEI-Alu | yes |
| XP52GO | chr4  | 186172333 | MEI-Alu | yes |
| XP52GO | chr6  | 71544668  | MEI-Alu | yes |
| XP52GO | chr8  | 119788552 | MEI-Alu | yes |
| XP52GO | chr9  | 136768496 | MEI-Alu | yes |
| XP52GO | chr19 | 20563166  | MEI-Alu | yes |
| XP52GO | chr2  | 21573955  | MEI-Alu | yes |
| XP52GO | chr8  | 74463111  | MEI-Alu | yes |
| XP85GO | chr1  | 20618244  | MEI-Alu | yes |

|        |       |           |         |     |
|--------|-------|-----------|---------|-----|
| XP85GO | chr1  | 92701962  | MEI-Alu | yes |
| XP85GO | chr10 | 53046195  | MEI-Alu | yes |
| XP85GO | chr11 | 428014    | MEI-Alu | yes |
| XP85GO | chr13 | 101737016 | MEI-Alu | yes |
| XP85GO | chr15 | 76800144  | MEI-Alu | yes |
| XP85GO | chr17 | 63488529  | MEI-Alu | yes |
| XP85GO | chr19 | 41807206  | MEI-Alu | yes |
| XP85GO | chr19 | 52384817  | MEI-Alu | yes |
| XP85GO | chr19 | 9820429   | MEI-Alu | yes |
| XP85GO | chr2  | 137502222 | MEI-Alu | yes |
| XP85GO | chr22 | 17224400  | MEI-Alu | yes |
| XP85GO | chr4  | 185440770 | MEI-Alu | yes |
| XP85GO | chr4  | 185460992 | MEI-Alu | yes |
| XP85GO | chr4  | 186172333 | MEI-Alu | yes |
| XP85GO | chr5  | 95658505  | MEI-Alu | yes |
| XP85GO | chr6  | 14133803  | MEI-Alu | yes |
| XP85GO | chr6  | 71544668  | MEI-Alu | yes |
| XP85GO | chr8  | 119788552 | MEI-Alu | yes |
| XP85GO | chr8  | 41946763  | MEI-Alu | yes |
| XP85GO | chr9  | 7852538   | MEI-Alu | yes |
| XP03GO | chr2  | 102706037 | MEI-L1  | yes |
| XP03GO | chr2  | 32916254  | MEI-L1  | yes |
| XP03GO | chr2  | 32916256  | MEI-L1  | yes |
| XP03GO | chr2  | 32916257  | MEI-L1  | yes |
| XP03GO | chr9  | 97913251  | MEI-L1  | yes |
| XP06GO | chr1  | 169555621 | MEI-L1  | yes |
| XP06GO | chr2  | 102706037 | MEI-L1  | yes |
| XP06GO | chr2  | 32916254  | MEI-L1  | yes |
| XP06GO | chr2  | 32916256  | MEI-L1  | yes |
| XP06GO | chr2  | 32916257  | MEI-L1  | yes |
| XP06GO | chr5  | 115057973 | MEI-L1  | yes |
| XP11GO | chr2  | 32916254  | MEI-L1  | yes |
| XP11GO | chr2  | 32916256  | MEI-L1  | yes |
| XP11GO | chr2  | 32916257  | MEI-L1  | yes |
| XP11GO | chr5  | 115057973 | MEI-L1  | yes |
| XP45GO | chr2  | 32916254  | MEI-L1  | yes |
| XP45GO | chr2  | 32916256  | MEI-L1  | yes |
| XP45GO | chr2  | 32916257  | MEI-L1  | yes |
| XP45GO | chr22 | 43928709  | MEI-L1  | yes |
| XP45GO | chr9  | 97913251  | MEI-L1  | yes |
| XP52GO | chr2  | 102706037 | MEI-L1  | yes |
| XP52GO | chr2  | 32916254  | MEI-L1  | yes |
| XP52GO | chr2  | 32916257  | MEI-L1  | yes |
| XP52GO | chr3  | 101712435 | MEI-L1  | yes |

|        |       |           |          |     |
|--------|-------|-----------|----------|-----|
| XP85GO | chr2  | 102706037 | MEI-L1   | yes |
| XP85GO | chr2  | 32916254  | MEI-L1   | yes |
| XP85GO | chr2  | 32916256  | MEI-L1   | yes |
| XP85GO | chr2  | 32916257  | MEI-L1   | yes |
| XP85GO | chr22 | 43928709  | MEI-L1   | yes |
| XP03GO | chr4  | 9703222   | MEI-SVA  | yes |
| XP06GO | chr4  | 9703222   | MEI-SVA  | yes |
| XP06GO | chr6  | 43687667  | MEI-SVA  | yes |
| XP11GO | chr6  | 43687667  | MEI-SVA  | yes |
| XP03GO | chr1  | 109108012 | retroCNV | yes |
| XP03GO | chr1  | 221182809 | retroCNV | yes |
| XP03GO | chr11 | 38791107  | retroCNV | yes |
| XP03GO | chr11 | 58199876  | retroCNV | yes |
| XP03GO | chr12 | 125316601 | retroCNV | yes |
| XP03GO | chr15 | 40561980  | retroCNV | yes |
| XP03GO | chr9  | 33130550  | retroCNV | yes |
| XP06GO | chr1  | 109108012 | retroCNV | yes |
| XP06GO | chr1  | 221182809 | retroCNV | yes |
| XP06GO | chr11 | 27194661  | retroCNV | yes |
| XP06GO | chr11 | 38791107  | retroCNV | yes |
| XP06GO | chr12 | 125316601 | retroCNV | yes |
| XP06GO | chr13 | 40046135  | retroCNV | yes |
| XP06GO | chr15 | 40561980  | retroCNV | yes |
| XP06GO | chr8  | 22443288  | retroCNV | yes |
| XP06GO | chr9  | 33130550  | retroCNV | yes |
| XP11GO | chr1  | 109108012 | retroCNV | yes |
| XP11GO | chr1  | 221182809 | retroCNV | yes |
| XP11GO | chr11 | 27194661  | retroCNV | yes |
| XP11GO | chr11 | 58199876  | retroCNV | yes |
| XP11GO | chr12 | 125316601 | retroCNV | yes |
| XP11GO | chr15 | 40561980  | retroCNV | yes |
| XP11GO | chr8  | 22443288  | retroCNV | yes |
| XP11GO | chr9  | 33130550  | retroCNV | yes |
| XP52GO | chr1  | 221182809 | retroCNV | yes |
| XP52GO | chr11 | 27194661  | retroCNV | yes |
| XP52GO | chr11 | 38791107  | retroCNV | yes |
| XP52GO | chr12 | 125316601 | retroCNV | yes |
| XP52GO | chr15 | 40561980  | retroCNV | yes |
| XP52GO | chr17 | 7885350   | retroCNV | yes |
| XP85GO | chr1  | 221182809 | retroCNV | yes |
| XP85GO | chr12 | 125316601 | retroCNV | yes |
| XP85GO | chr13 | 40046135  | retroCNV | yes |
| XP85GO | chr15 | 40561980  | retroCNV | yes |
| XP85GO | chr9  | 33130550  | retroCNV | yes |

---

Supplementary Table 6

| Sample | Chr   | Start     | Class    | Putative somatic |
|--------|-------|-----------|----------|------------------|
| XP03GO | chr1  | 227414577 | MEI-Alu  | yes              |
| XP03GO | chr12 | 19722736  | MEI-Alu  | yes              |
| XP03GO | chr13 | 19032019  | MEI-Alu  | yes              |
| XP03GO | chr13 | 77560960  | MEI-Alu  | yes              |
| XP03GO | chr14 | 31422743  | MEI-Alu  | yes              |
| XP03GO | chr14 | 71402515  | MEI-Alu  | yes              |
| XP03GO | chr15 | 79503530  | MEI-Alu  | yes              |
| XP03GO | chr16 | 67805140  | MEI-Alu  | yes              |
| XP03GO | chr17 | 16769811  | MEI-Alu  | yes              |
| XP03GO | chr17 | 80082253  | MEI-Alu  | yes              |
| XP03GO | chr19 | 45325154  | MEI-Alu  | yes              |
| XP03GO | chr2  | 151458477 | MEI-Alu  | yes              |
| XP03GO | chr2  | 162822107 | MEI-Alu  | yes              |
| XP03GO | chr2  | 236062557 | MEI-Alu  | yes              |
| XP03GO | chr20 | 3057234   | MEI-Alu  | yes              |
| XP03GO | chr3  | 9635210   | MEI-Alu  | yes              |
| XP03GO | chr4  | 68079061  | MEI-Alu  | yes              |
| XP03GO | chr4  | 83637030  | MEI-Alu  | yes              |
| XP03GO | chr5  | 13831015  | MEI-Alu  | yes              |
| XP03GO | chr5  | 157139729 | MEI-Alu  | yes              |
| XP03GO | chr5  | 160080694 | MEI-Alu  | yes              |
| XP03GO | chr6  | 70411459  | MEI-Alu  | yes              |
| XP03GO | chr8  | 113780679 | MEI-Alu  | yes              |
| XP03GO | chr8  | 127344421 | MEI-Alu  | yes              |
| XP03GO | chr9  | 73375741  | MEI-Alu  | yes              |
| XP03GO | chrX  | 45459626  | MEI-Alu  | yes              |
| XP03GO | chr11 | 108514359 | MEI-L1   | yes              |
| XP03GO | chr11 | 134435753 | MEI-L1   | yes              |
| XP03GO | chr15 | 55958954  | MEI-L1   | yes              |
| XP03GO | chr15 | 87278910  | MEI-L1   | yes              |
| XP03GO | chr2  | 15026175  | MEI-L1   | yes              |
| XP03GO | chr2  | 32916253  | MEI-L1   | yes              |
| XP03GO | chr3  | 186654352 | MEI-L1   | yes              |
| XP03GO | chr4  | 116779942 | MEI-L1   | yes              |
| XP03GO | chr5  | 110144556 | MEI-L1   | yes              |
| XP03GO | chr5  | 32415140  | MEI-L1   | yes              |
| XP03GO | chr1  | 191743287 | retroCNV | yes              |
| XP03GO | chr11 | 67759312  | retroCNV | yes              |
| XP03GO | chr11 | 73391889  | retroCNV | yes              |
| XP03GO | chr12 | 5799706   | retroCNV | yes              |
| XP03GO | chr17 | 32157815  | retroCNV | yes              |
| XP03GO | chr2  | 15965136  | retroCNV | yes              |
| XP03GO | chr2  | 96259884  | retroCNV | yes              |
| XP03GO | chr2  | 114469868 | retroCNV | yes              |

|          |       |           |          |     |
|----------|-------|-----------|----------|-----|
| XP03GO   | chr20 | 8125823   | retroCNV | yes |
| XP03GO   | chr3  | 13144967  | retroCNV | yes |
| XP03GO   | chr3  | 42201917  | retroCNV | yes |
| XP03GO   | chr3  | 142566603 | retroCNV | yes |
| XP03GO   | chr4  | 40797843  | retroCNV | yes |
| XP03GO   | chr4  | 98517880  | retroCNV | yes |
| XP03GO   | chr4  | 188107213 | retroCNV | yes |
| XP03GO   | chr5  | 3079846   | retroCNV | yes |
| XP03GO   | chr5  | 87281071  | retroCNV | yes |
| XP03GO   | chr5  | 142977287 | retroCNV | yes |
| XP03GO   | chr7  | 114698620 | retroCNV | yes |
| XP03GO   | chr8  | 108118141 | retroCNV | yes |
| XP03GO   | chr9  | 123035315 | retroCNV | yes |
| XP03GO   | chrX  | 49269510  | retroCNV | yes |
| XP06GO_1 | chr1  | 196811798 | MEI-Alu  | yes |
| XP06GO_1 | chr1  | 207767565 | MEI-Alu  | yes |
| XP06GO_1 | chr1  | 57962641  | MEI-Alu  | yes |
| XP06GO_1 | chr10 | 46022526  | MEI-Alu  | yes |
| XP06GO_1 | chr10 | 57142454  | MEI-Alu  | yes |
| XP06GO_1 | chr10 | 60365100  | MEI-Alu  | yes |
| XP06GO_1 | chr11 | 107946134 | MEI-Alu  | yes |
| XP06GO_1 | chr12 | 4661708   | MEI-Alu  | yes |
| XP06GO_1 | chr12 | 47918707  | MEI-Alu  | yes |
| XP06GO_1 | chr16 | 11579499  | MEI-Alu  | yes |
| XP06GO_1 | chr17 | 22141618  | MEI-Alu  | yes |
| XP06GO_1 | chr4  | 179335800 | MEI-Alu  | yes |
| XP06GO_1 | chr4  | 26484866  | MEI-Alu  | yes |
| XP06GO_1 | chr6  | 106365679 | MEI-Alu  | yes |
| XP06GO_1 | chr6  | 106481273 | MEI-Alu  | yes |
| XP06GO_1 | chr7  | 158930169 | MEI-Alu  | yes |
| XP06GO_1 | chrM  | 10850     | MEI-Alu  | yes |
| XP06GO_1 | chrX  | 118456970 | MEI-Alu  | yes |
| XP06GO_1 | chr1  | 233826463 | MEI-L1   | yes |
| XP06GO_1 | chr10 | 23553112  | MEI-L1   | yes |
| XP06GO_1 | chr13 | 37993308  | MEI-L1   | yes |
| XP06GO_1 | chr17 | 2377533   | MEI-L1   | yes |
| XP06GO_1 | chr2  | 146084981 | MEI-L1   | yes |
| XP06GO_1 | chr3  | 123871879 | MEI-L1   | yes |
| XP06GO_1 | chr4  | 123971835 | MEI-L1   | yes |
| XP06GO_1 | chr4  | 131260492 | MEI-L1   | yes |
| XP06GO_1 | chr5  | 129107059 | MEI-L1   | yes |
| XP06GO_1 | chr10 | 26939156  | MEI-SVA  | yes |
| XP06GO_1 | chr11 | 22482602  | retroCNV | yes |
| XP06GO_1 | chr12 | 62302147  | retroCNV | yes |
| XP06GO_1 | chr15 | 98287269  | retroCNV | yes |
| XP06GO_1 | chr17 | 34151550  | retroCNV | yes |
| XP06GO_1 | chr18 | 34352976  | retroCNV | yes |



|          |       |           |          |     |
|----------|-------|-----------|----------|-----|
| XP06GO_1 | chr21 | 28618935  | retroCNV | yes |
| XP06GO_1 | chr3  | 14842879  | retroCNV | yes |
| XP06GO_1 | chr3  | 180986068 | retroCNV | yes |
| XP06GO_1 | chr3  | 186100783 | retroCNV | yes |
| XP06GO_1 | chr5  | 11629149  | retroCNV | yes |
| XP06GO_1 | chr6  | 15945934  | retroCNV | yes |
| XP06GO_1 | chr6  | 23322335  | retroCNV | yes |
| XP06GO_1 | chr8  | 47677159  | retroCNV | yes |
| XP06GO_1 | chr8  | 101739598 | retroCNV | yes |
| XP06GO_1 | chr8  | 133055875 | retroCNV | yes |
| XP06GO_1 | chr9  | 114930289 | retroCNV | yes |
| XP06GO_2 | chr1  | 212145296 | MEI-Alu  | yes |
| XP06GO_2 | chr1  | 247125683 | MEI-Alu  | yes |
| XP06GO_2 | chr1  | 39351729  | MEI-Alu  | yes |
| XP06GO_2 | chr1  | 70997553  | MEI-Alu  | yes |
| XP06GO_2 | chr10 | 123843236 | MEI-Alu  | yes |
| XP06GO_2 | chr10 | 43102664  | MEI-Alu  | yes |
| XP06GO_2 | chr11 | 61001491  | MEI-Alu  | yes |
| XP06GO_2 | chr12 | 57750921  | MEI-Alu  | yes |
| XP06GO_2 | chr13 | 37375844  | MEI-Alu  | yes |
| XP06GO_2 | chr13 | 41327735  | MEI-Alu  | yes |
| XP06GO_2 | chr13 | 78697466  | MEI-Alu  | yes |
| XP06GO_2 | chr13 | 81236057  | MEI-Alu  | yes |
| XP06GO_2 | chr13 | 99132558  | MEI-Alu  | yes |
| XP06GO_2 | chr14 | 57277732  | MEI-Alu  | yes |
| XP06GO_2 | chr15 | 42156533  | MEI-Alu  | yes |
| XP06GO_2 | chr18 | 47907702  | MEI-Alu  | yes |
| XP06GO_2 | chr19 | 10151719  | MEI-Alu  | yes |
| XP06GO_2 | chr2  | 217818211 | MEI-Alu  | yes |
| XP06GO_2 | chr2  | 230252768 | MEI-Alu  | yes |
| XP06GO_2 | chr3  | 156522084 | MEI-Alu  | yes |
| XP06GO_2 | chr3  | 185544949 | MEI-Alu  | yes |
| XP06GO_2 | chr4  | 105449241 | MEI-Alu  | yes |
| XP06GO_2 | chr4  | 110013803 | MEI-Alu  | yes |
| XP06GO_2 | chr6  | 5348529   | MEI-Alu  | yes |
| XP06GO_2 | chr6  | 79077973  | MEI-Alu  | yes |
| XP06GO_2 | chr8  | 101201606 | MEI-Alu  | yes |
| XP06GO_2 | chr8  | 134712799 | MEI-Alu  | yes |
| XP06GO_2 | chr8  | 22922452  | MEI-Alu  | yes |
| XP06GO_2 | chr8  | 41412939  | MEI-Alu  | yes |
| XP06GO_2 | chr8  | 60614220  | MEI-Alu  | yes |
| XP06GO_2 | chr8  | 92038356  | MEI-Alu  | yes |
| XP06GO_2 | chr1  | 42775364  | MEI-L1   | yes |
| XP06GO_2 | chr1  | 75700352  | MEI-L1   | yes |
| XP06GO_2 | chr14 | 36205554  | MEI-L1   | yes |
| XP06GO_2 | chr15 | 100341874 | MEI-L1   | yes |
| XP06GO_2 | chr17 | 30071290  | MEI-L1   | yes |

|          |       |           |          |     |
|----------|-------|-----------|----------|-----|
| XP06GO_2 | chr4  | 190117296 | MEI-L1   | yes |
| XP06GO_2 | chr4  | 85783942  | MEI-L1   | yes |
| XP06GO_2 | chr1  | 111959485 | retroCNV | yes |
| XP06GO_2 | chr1  | 191608630 | retroCNV | yes |
| XP06GO_2 | chr1  | 206485306 | retroCNV | yes |
| XP06GO_2 | chr1  | 220712244 | retroCNV | yes |
| XP06GO_2 | chr10 | 44510929  | retroCNV | yes |
| XP06GO_2 | chr10 | 117483590 | retroCNV | yes |
| XP06GO_2 | chr12 | 343209    | retroCNV | yes |
| XP06GO_2 | chr12 | 106594694 | retroCNV | yes |
| XP06GO_2 | chr16 | 82286877  | retroCNV | yes |
| XP06GO_2 | chr2  | 23972787  | retroCNV | yes |
| XP06GO_2 | chr2  | 78867933  | retroCNV | yes |
| XP06GO_2 | chr2  | 159858461 | retroCNV | yes |
| XP06GO_2 | chr21 | 29297506  | retroCNV | yes |
| XP06GO_2 | chr3  | 12829439  | retroCNV | yes |
| XP06GO_2 | chr3  | 48683547  | retroCNV | yes |
| XP06GO_2 | chr3  | 73112464  | retroCNV | yes |
| XP06GO_2 | chr4  | 99413345  | retroCNV | yes |
| XP06GO_2 | chr5  | 39115382  | retroCNV | yes |
| XP06GO_2 | chr5  | 140365871 | retroCNV | yes |
| XP06GO_2 | chr5  | 150413520 | retroCNV | yes |
| XP06GO_2 | chr6  | 6193235   | retroCNV | yes |
| XP06GO_2 | chr6  | 108589443 | retroCNV | yes |
| XP06GO_2 | chr7  | 43625598  | retroCNV | yes |
| XP06GO_2 | chr7  | 69225629  | retroCNV | yes |
| XP06GO_2 | chr9  | 3776260   | retroCNV | yes |
| XP06GO_2 | chr9  | 122586748 | retroCNV | yes |
| XP06GO_2 | chr9  | 128635413 | retroCNV | yes |
| XP06GO_3 | chr10 | 69850419  | MEI-Alu  | yes |
| XP06GO_3 | chr12 | 117055163 | MEI-Alu  | yes |
| XP06GO_3 | chr2  | 9748660   | MEI-Alu  | yes |
| XP06GO_3 | chr22 | 26601643  | MEI-Alu  | yes |
| XP06GO_3 | chr3  | 172605146 | MEI-Alu  | yes |
| XP06GO_3 | chr7  | 125908192 | MEI-Alu  | yes |
| XP06GO_3 | chr10 | 68394359  | MEI-L1   | yes |
| XP06GO_3 | chr6  | 77765940  | MEI-L1   | yes |
| XP06GO_3 | chr18 | 11960675  | MEI-SVA  | yes |
| XP06GO_3 | chr15 | 93296472  | retroCNV | yes |
| XP06GO_4 | chr1  | 19471896  | MEI-Alu  | yes |
| XP06GO_4 | chr10 | 80353984  | MEI-Alu  | yes |
| XP06GO_4 | chr11 | 103330538 | MEI-Alu  | yes |
| XP06GO_4 | chr11 | 127045430 | MEI-Alu  | yes |
| XP06GO_4 | chr18 | 33953227  | MEI-Alu  | yes |
| XP06GO_4 | chr2  | 147883186 | MEI-Alu  | yes |
| XP06GO_4 | chr3  | 78394509  | MEI-Alu  | yes |
| XP06GO_4 | chr5  | 155863614 | MEI-Alu  | yes |

|          |       |           |          |     |
|----------|-------|-----------|----------|-----|
| XP06GO_4 | chr8  | 30984336  | MEI-Alu  | yes |
| XP06GO_4 | chr3  | 38584591  | MEI-L1   | yes |
| XP06GO_4 | chr6  | 22147156  | MEI-L1   | yes |
| XP06GO_4 | chr7  | 145560488 | MEI-L1   | yes |
| XP06GO_4 | chr7  | 57668467  | MEI-L1   | yes |
| XP06GO_4 | chr1  | 22729253  | retroCNV | yes |
| XP06GO_4 | chr1  | 201303808 | retroCNV | yes |
| XP06GO_4 | chr12 | 63323494  | retroCNV | yes |
| XP06GO_4 | chr16 | 8930336   | retroCNV | yes |
| XP06GO_4 | chr2  | 223908560 | retroCNV | yes |
| XP11GO   | chr1  | 160077875 | MEI-Alu  | yes |
| XP11GO   | chr1  | 196917129 | MEI-Alu  | yes |
| XP11GO   | chr1  | 233727113 | MEI-Alu  | yes |
| XP11GO   | chr11 | 23501258  | MEI-Alu  | yes |
| XP11GO   | chr11 | 25583592  | MEI-Alu  | yes |
| XP11GO   | chr11 | 42034362  | MEI-Alu  | yes |
| XP11GO   | chr11 | 81454388  | MEI-Alu  | yes |
| XP11GO   | chr12 | 111448186 | MEI-Alu  | yes |
| XP11GO   | chr12 | 56133724  | MEI-Alu  | yes |
| XP11GO   | chr13 | 22496055  | MEI-Alu  | yes |
| XP11GO   | chr14 | 28158712  | MEI-Alu  | yes |
| XP11GO   | chr14 | 34483263  | MEI-Alu  | yes |
| XP11GO   | chr14 | 35009343  | MEI-Alu  | yes |
| XP11GO   | chr15 | 68767800  | MEI-Alu  | yes |
| XP11GO   | chr16 | 11579494  | MEI-Alu  | yes |
| XP11GO   | chr16 | 58766988  | MEI-Alu  | yes |
| XP11GO   | chr16 | 68940586  | MEI-Alu  | yes |
| XP11GO   | chr3  | 118453221 | MEI-Alu  | yes |
| XP11GO   | chr3  | 18993960  | MEI-Alu  | yes |
| XP11GO   | chr4  | 55974806  | MEI-Alu  | yes |
| XP11GO   | chr5  | 162804931 | MEI-Alu  | yes |
| XP11GO   | chr5  | 87076878  | MEI-Alu  | yes |
| XP11GO   | chr6  | 26994392  | MEI-Alu  | yes |
| XP11GO   | chr8  | 113729336 | MEI-Alu  | yes |
| XP11GO   | chr8  | 136679302 | MEI-Alu  | yes |
| XP11GO   | chr8  | 88014563  | MEI-Alu  | yes |
| XP11GO   | chr9  | 101461593 | MEI-Alu  | yes |
| XP11GO   | chrX  | 3957594   | MEI-Alu  | yes |
| XP11GO   | chrX  | 50634935  | MEI-Alu  | yes |
| XP11GO   | chr1  | 199646838 | MEI-L1   | yes |
| XP11GO   | chr12 | 48324886  | MEI-L1   | yes |
| XP11GO   | chr14 | 39010090  | MEI-L1   | yes |
| XP11GO   | chr17 | 4735501   | MEI-L1   | yes |
| XP11GO   | chr2  | 220639029 | MEI-L1   | yes |
| XP11GO   | chr21 | 42407333  | MEI-L1   | yes |
| XP11GO   | chr3  | 90872023  | MEI-L1   | yes |
| XP11GO   | chr4  | 114211547 | MEI-L1   | yes |

|        |       |           |          |     |
|--------|-------|-----------|----------|-----|
| XP11GO | chr4  | 132632536 | MEI-L1   | yes |
| XP11GO | chr5  | 92621451  | MEI-L1   | yes |
| XP11GO | chr6  | 147800366 | MEI-L1   | yes |
| XP11GO | chr9  | 112133994 | MEI-L1   | yes |
| XP11GO | chr1  | 94604228  | retroCNV | yes |
| XP11GO | chr1  | 176028861 | retroCNV | yes |
| XP11GO | chr10 | 3520437   | retroCNV | yes |
| XP11GO | chr12 | 29873548  | retroCNV | yes |
| XP11GO | chr13 | 19114615  | retroCNV | yes |
| XP11GO | chr15 | 40735497  | retroCNV | yes |
| XP11GO | chr16 | 57100779  | retroCNV | yes |
| XP11GO | chr16 | 68569361  | retroCNV | yes |
| XP11GO | chr17 | 11328943  | retroCNV | yes |
| XP11GO | chr17 | 81957100  | retroCNV | yes |
| XP11GO | chr18 | 7619420   | retroCNV | yes |
| XP11GO | chr18 | 44573486  | retroCNV | yes |
| XP11GO | chr18 | 66272128  | retroCNV | yes |
| XP11GO | chr18 | 75374358  | retroCNV | yes |
| XP11GO | chr19 | 1581509   | retroCNV | yes |
| XP11GO | chr19 | 36418814  | retroCNV | yes |
| XP11GO | chr19 | 52308189  | retroCNV | yes |
| XP11GO | chr2  | 53324236  | retroCNV | yes |
| XP11GO | chr2  | 65092929  | retroCNV | yes |
| XP11GO | chr22 | 30952155  | retroCNV | yes |
| XP11GO | chr22 | 44438629  | retroCNV | yes |
| XP11GO | chr3  | 13367614  | retroCNV | yes |
| XP11GO | chr4  | 6545462   | retroCNV | yes |
| XP11GO | chr4  | 31026179  | retroCNV | yes |
| XP11GO | chr4  | 44258565  | retroCNV | yes |
| XP11GO | chr4  | 48809166  | retroCNV | yes |
| XP11GO | chr4  | 109820286 | retroCNV | yes |
| XP11GO | chr5  | 1681033   | retroCNV | yes |
| XP11GO | chr6  | 95641643  | retroCNV | yes |
| XP11GO | chr7  | 75951606  | retroCNV | yes |
| XP11GO | chr7  | 106190581 | retroCNV | yes |
| XP11GO | chr8  | 22692988  | retroCNV | yes |
| XP11GO | chr8  | 46996611  | retroCNV | yes |
| XP11GO | chr8  | 83209270  | retroCNV | yes |
| XP11GO | chr8  | 109478786 | retroCNV | yes |
| XP11GO | chr8  | 128099452 | retroCNV | yes |
| XP45GO | chr1  | 16057263  | MEI-Alu  | yes |
| XP45GO | chr1  | 27253754  | MEI-Alu  | yes |
| XP45GO | chr11 | 133555206 | MEI-Alu  | yes |
| XP45GO | chr12 | 83692333  | MEI-Alu  | yes |
| XP45GO | chr13 | 26376203  | MEI-Alu  | yes |
| XP45GO | chr20 | 16248011  | MEI-Alu  | yes |
| XP45GO | chr20 | 55145311  | MEI-Alu  | yes |

|          |       |           |          |     |
|----------|-------|-----------|----------|-----|
| XP45GO   | chr21 | 29703769  | MEI-Alu  | yes |
| XP45GO   | chr3  | 171908583 | MEI-Alu  | yes |
| XP45GO   | chr3  | 174692946 | MEI-Alu  | yes |
| XP45GO   | chr3  | 2772357   | MEI-Alu  | yes |
| XP45GO   | chr5  | 37688709  | MEI-Alu  | yes |
| XP45GO   | chr7  | 2424371   | MEI-Alu  | yes |
| XP45GO   | chr7  | 95248186  | MEI-Alu  | yes |
| XP45GO   | chr8  | 22368514  | MEI-Alu  | yes |
| XP45GO   | chr9  | 42746579  | MEI-Alu  | yes |
| XP45GO   | chr9  | 76337149  | MEI-Alu  | yes |
| XP45GO   | chr11 | 62575356  | MEI-L1   | yes |
| XP45GO   | chr11 | 8399234   | MEI-L1   | yes |
| XP45GO   | chr12 | 31020266  | MEI-L1   | yes |
| XP45GO   | chr4  | 41354432  | MEI-L1   | yes |
| XP45GO   | chr19 | 23845119  | MEI-SVA  | yes |
| XP45GO   | chr1  | 59552137  | retroCNV | yes |
| XP45GO   | chr1  | 116536227 | retroCNV | yes |
| XP45GO   | chr10 | 64950545  | retroCNV | yes |
| XP45GO   | chr11 | 69120088  | retroCNV | yes |
| XP45GO   | chr13 | 113727350 | retroCNV | yes |
| XP45GO   | chr15 | 78248231  | retroCNV | yes |
| XP45GO   | chr18 | 56489936  | retroCNV | yes |
| XP45GO   | chr19 | 45976634  | retroCNV | yes |
| XP45GO   | chr2  | 38509459  | retroCNV | yes |
| XP45GO   | chr2  | 122663903 | retroCNV | yes |
| XP45GO   | chr2  | 178495137 | retroCNV | yes |
| XP45GO   | chr22 | 32793639  | retroCNV | yes |
| XP45GO   | chr3  | 32890868  | retroCNV | yes |
| XP45GO   | chr3  | 173636930 | retroCNV | yes |
| XP45GO   | chr4  | 168482442 | retroCNV | yes |
| XP45GO   | chr4  | 185251360 | retroCNV | yes |
| XP45GO   | chr5  | 12935329  | retroCNV | yes |
| XP45GO   | chr8  | 123025031 | retroCNV | yes |
| XP45GO   | chr8  | 139560859 | retroCNV | yes |
| XP45GO   | chr9  | 77651505  | retroCNV | yes |
| XP52GO_1 | chr1  | 70446750  | MEI-Alu  | yes |
| XP52GO_1 | chr10 | 95612859  | MEI-Alu  | yes |
| XP52GO_1 | chr11 | 41448552  | MEI-Alu  | yes |
| XP52GO_1 | chr13 | 87924838  | MEI-Alu  | yes |
| XP52GO_1 | chr17 | 48539858  | MEI-Alu  | yes |
| XP52GO_1 | chr17 | 74372417  | MEI-Alu  | yes |
| XP52GO_1 | chr20 | 54108683  | MEI-Alu  | yes |
| XP52GO_1 | chr22 | 19585578  | MEI-Alu  | yes |
| XP52GO_1 | chr3  | 96155673  | MEI-Alu  | yes |
| XP52GO_1 | chr5  | 109715291 | MEI-Alu  | yes |
| XP52GO_1 | chr7  | 124141306 | MEI-Alu  | yes |
| XP52GO_1 | chr7  | 127835618 | MEI-Alu  | yes |

|          |       |           |          |     |
|----------|-------|-----------|----------|-----|
| XP52GO_1 | chr8  | 71293822  | MEI-Alu  | yes |
| XP52GO_1 | chr8  | 78616457  | MEI-Alu  | yes |
| XP52GO_1 | chr9  | 74909421  | MEI-Alu  | yes |
| XP52GO_1 | chr1  | 85582466  | MEI-L1   | yes |
| XP52GO_1 | chr10 | 105553984 | MEI-L1   | yes |
| XP52GO_1 | chr12 | 111901216 | MEI-L1   | yes |
| XP52GO_1 | chr18 | 22285088  | MEI-L1   | yes |
| XP52GO_1 | chr2  | 49214691  | MEI-L1   | yes |
| XP52GO_1 | chr3  | 111380393 | MEI-L1   | yes |
| XP52GO_1 | chr8  | 119476661 | MEI-L1   | yes |
| XP52GO_1 | chr8  | 133959999 | MEI-L1   | yes |
| XP52GO_1 | chr9  | 100303735 | MEI-L1   | yes |
| XP52GO_1 | chr9  | 72289997  | MEI-L1   | yes |
| XP52GO_1 | chr10 | 69213563  | MEI-SVA  | yes |
| XP52GO_1 | chr12 | 78946590  | MEI-SVA  | yes |
| XP52GO_1 | chr18 | 49810945  | MEI-SVA  | yes |
| XP52GO_1 | chr9  | 122853996 | MEI-SVA  | yes |
| XP52GO_1 | chr1  | 175342356 | retroCNV | yes |
| XP52GO_1 | chr1  | 208311225 | retroCNV | yes |
| XP52GO_1 | chr10 | 45578006  | retroCNV | yes |
| XP52GO_1 | chr11 | 39952346  | retroCNV | yes |
| XP52GO_1 | chr12 | 128466525 | retroCNV | yes |
| XP52GO_1 | chr14 | 48626911  | retroCNV | yes |
| XP52GO_1 | chr14 | 66472071  | retroCNV | yes |
| XP52GO_1 | chr14 | 72143500  | retroCNV | yes |
| XP52GO_1 | chr15 | 33662861  | retroCNV | yes |
| XP52GO_1 | chr17 | 10722502  | retroCNV | yes |
| XP52GO_1 | chr18 | 22088110  | retroCNV | yes |
| XP52GO_1 | chr2  | 31985611  | retroCNV | yes |
| XP52GO_1 | chr2  | 128493720 | retroCNV | yes |
| XP52GO_1 | chr2  | 203522644 | retroCNV | yes |
| XP52GO_1 | chr2  | 210392963 | retroCNV | yes |
| XP52GO_1 | chr20 | 51102655  | retroCNV | yes |
| XP52GO_1 | chr3  | 77983665  | retroCNV | yes |
| XP52GO_1 | chr5  | 86540336  | retroCNV | yes |
| XP52GO_1 | chr5  | 158405809 | retroCNV | yes |
| XP52GO_1 | chr6  | 124364609 | retroCNV | yes |
| XP52GO_1 | chr6  | 167871481 | retroCNV | yes |
| XP52GO_1 | chr8  | 5940020   | retroCNV | yes |
| XP52GO_1 | chr8  | 65871921  | retroCNV | yes |
| XP52GO_1 | chr9  | 107202554 | retroCNV | yes |
| XP52GO_2 | chr10 | 28132927  | MEI-Alu  | yes |
| XP52GO_2 | chr10 | 46647423  | MEI-Alu  | yes |
| XP52GO_2 | chr12 | 111618446 | MEI-Alu  | yes |
| XP52GO_2 | chr16 | 24805704  | MEI-Alu  | yes |
| XP52GO_2 | chr17 | 75596573  | MEI-Alu  | yes |
| XP52GO_2 | chr6  | 10762465  | MEI-Alu  | yes |

|          |       |           |          |     |
|----------|-------|-----------|----------|-----|
| XP52GO_2 | chr8  | 116034794 | MEI-Alu  | yes |
| XP52GO_2 | chr2  | 73503424  | MEI-L1   | yes |
| XP52GO_2 | chr3  | 113410353 | MEI-L1   | yes |
| XP52GO_2 | chr17 | 71139551  | retroCNV | yes |
| XP52GO_2 | chr4  | 123674956 | retroCNV | yes |
| XP52GO_2 | chr7  | 131251214 | retroCNV | yes |
| XP85GO_1 | chr11 | 48911557  | MEI-Alu  | yes |
| XP85GO_1 | chr12 | 28136067  | MEI-Alu  | yes |
| XP85GO_1 | chr12 | 38984453  | MEI-Alu  | yes |
| XP85GO_1 | chr13 | 108133285 | MEI-Alu  | yes |
| XP85GO_1 | chr13 | 42688592  | MEI-Alu  | yes |
| XP85GO_1 | chr13 | 46521218  | MEI-Alu  | yes |
| XP85GO_1 | chr13 | 79624957  | MEI-Alu  | yes |
| XP85GO_1 | chr16 | 14405443  | MEI-Alu  | yes |
| XP85GO_1 | chr16 | 53841069  | MEI-Alu  | yes |
| XP85GO_1 | chr17 | 21814103  | MEI-Alu  | yes |
| XP85GO_1 | chr17 | 28869902  | MEI-Alu  | yes |
| XP85GO_1 | chr4  | 108659090 | MEI-Alu  | yes |
| XP85GO_1 | chr4  | 183463282 | MEI-Alu  | yes |
| XP85GO_1 | chr4  | 65764464  | MEI-Alu  | yes |
| XP85GO_1 | chr7  | 23626066  | MEI-Alu  | yes |
| XP85GO_1 | chr9  | 124044401 | MEI-Alu  | yes |
| XP85GO_1 | chr15 | 47215131  | MEI-L1   | yes |
| XP85GO_1 | chr18 | 39874252  | MEI-L1   | yes |
| XP85GO_1 | chr2  | 137488062 | MEI-L1   | yes |
| XP85GO_1 | chr2  | 146263358 | MEI-L1   | yes |
| XP85GO_1 | chr3  | 111556218 | MEI-L1   | yes |
| XP85GO_1 | chr3  | 58278429  | MEI-L1   | yes |
| XP85GO_1 | chr9  | 79861141  | MEI-L1   | yes |
| XP85GO_1 | chr2  | 55676601  | MEI-SVA  | yes |
| XP85GO_1 | chr10 | 99365030  | retroCNV | yes |
| XP85GO_1 | chr11 | 74699711  | retroCNV | yes |
| XP85GO_1 | chr14 | 30252861  | retroCNV | yes |
| XP85GO_1 | chr15 | 40258743  | retroCNV | yes |
| XP85GO_1 | chr15 | 55565856  | retroCNV | yes |
| XP85GO_1 | chr16 | 86405752  | retroCNV | yes |
| XP85GO_1 | chr19 | 46607282  | retroCNV | yes |
| XP85GO_1 | chr22 | 44887892  | retroCNV | yes |
| XP85GO_1 | chr3  | 117912232 | retroCNV | yes |
| XP85GO_1 | chr3  | 177037638 | retroCNV | yes |
| XP85GO_1 | chr5  | 99281539  | retroCNV | yes |
| XP85GO_1 | chr6  | 150811672 | retroCNV | yes |
| XP85GO_2 | chr1  | 218429247 | MEI-Alu  | yes |
| XP85GO_2 | chr1  | 231796363 | MEI-Alu  | yes |
| XP85GO_2 | chr11 | 56535887  | MEI-Alu  | yes |
| XP85GO_2 | chr12 | 121806053 | MEI-Alu  | yes |
| XP85GO_2 | chr14 | 59987437  | MEI-Alu  | yes |

|          |       |           |          |     |
|----------|-------|-----------|----------|-----|
| XP85GO_2 | chr15 | 39399404  | MEI-Alu  | yes |
| XP85GO_2 | chr15 | 40954299  | MEI-Alu  | yes |
| XP85GO_2 | chr15 | 78513317  | MEI-Alu  | yes |
| XP85GO_2 | chr16 | 18948781  | MEI-Alu  | yes |
| XP85GO_2 | chr17 | 56870222  | MEI-Alu  | yes |
| XP85GO_2 | chr2  | 113348869 | MEI-Alu  | yes |
| XP85GO_2 | chr2  | 114633159 | MEI-Alu  | yes |
| XP85GO_2 | chr2  | 22717723  | MEI-Alu  | yes |
| XP85GO_2 | chr2  | 54889450  | MEI-Alu  | yes |
| XP85GO_2 | chr22 | 19373922  | MEI-Alu  | yes |
| XP85GO_2 | chr3  | 122726900 | MEI-Alu  | yes |
| XP85GO_2 | chr3  | 57421657  | MEI-Alu  | yes |
| XP85GO_2 | chr3  | 99007932  | MEI-Alu  | yes |
| XP85GO_2 | chr6  | 151076419 | MEI-Alu  | yes |
| XP85GO_2 | chr7  | 1092039   | MEI-Alu  | yes |
| XP85GO_2 | chr7  | 78107875  | MEI-Alu  | yes |
| XP85GO_2 | chr7  | 98568474  | MEI-Alu  | yes |
| XP85GO_2 | chr8  | 61915551  | MEI-Alu  | yes |
| XP85GO_2 | chr9  | 26476357  | MEI-Alu  | yes |
| XP85GO_2 | chr9  | 82290303  | MEI-Alu  | yes |
| XP85GO_2 | chr9  | 99385086  | MEI-Alu  | yes |
| XP85GO_2 | chr1  | 201221526 | MEI-L1   | yes |
| XP85GO_2 | chr1  | 75833543  | MEI-L1   | yes |
| XP85GO_2 | chr11 | 28991341  | MEI-L1   | yes |
| XP85GO_2 | chr2  | 15026487  | MEI-L1   | yes |
| XP85GO_2 | chr2  | 186987891 | MEI-L1   | yes |
| XP85GO_2 | chr20 | 22117082  | MEI-L1   | yes |
| XP85GO_2 | chr7  | 108188819 | MEI-L1   | yes |
| XP85GO_2 | chr9  | 27241882  | MEI-L1   | yes |
| XP85GO_2 | chr6  | 153108721 | MEI-SVA  | yes |
| XP85GO_2 | chr9  | 93075916  | MEI-SVA  | yes |
| XP85GO_2 | chr1  | 114738217 | retroCNV | yes |
| XP85GO_2 | chr1  | 161282685 | retroCNV | yes |
| XP85GO_2 | chr11 | 64599164  | retroCNV | yes |
| XP85GO_2 | chr15 | 96751192  | retroCNV | yes |
| XP85GO_2 | chr16 | 72122927  | retroCNV | yes |
| XP85GO_2 | chr17 | 6108894   | retroCNV | yes |
| XP85GO_2 | chr17 | 57424738  | retroCNV | yes |
| XP85GO_2 | chr18 | 59100745  | retroCNV | yes |
| XP85GO_2 | chr19 | 17555979  | retroCNV | yes |
| XP85GO_2 | chr2  | 45823048  | retroCNV | yes |
| XP85GO_2 | chr2  | 54710268  | retroCNV | yes |
| XP85GO_2 | chr2  | 143674834 | retroCNV | yes |
| XP85GO_2 | chr2  | 159189792 | retroCNV | yes |
| XP85GO_2 | chr22 | 26623361  | retroCNV | yes |
| XP85GO_2 | chr3  | 122149653 | retroCNV | yes |
| XP85GO_2 | chr5  | 87822085  | retroCNV | yes |



|          |      |           |          |     |
|----------|------|-----------|----------|-----|
| XP85GO_2 | chr5 | 123001489 | retroCNV | yes |
| XP85GO_2 | chr6 | 22208564  | retroCNV | yes |
| XP85GO_2 | chr7 | 54679749  | retroCNV | yes |
| XP85GO_2 | chr7 | 88366469  | retroCNV | yes |
| XP85GO_2 | chr7 | 96949512  | retroCNV | yes |
| XP85GO_2 | chr7 | 151395256 | retroCNV | yes |
| XP85GO_2 | chr8 | 50082791  | retroCNV | yes |
| XP85GO_2 | chr8 | 62314115  | retroCNV | yes |
| XP85GO_2 | chr9 | 89405550  | retroCNV | yes |
| XP85GO_2 | chr9 | 136483902 | retroCNV | yes |
| XP85GO_2 | chrX | 112618715 | retroCNV | yes |

---

**Supplementary Table 7**

| <b>Sample</b> | <b>Chr</b> | <b>Position</b> | <b>Gene_host</b> | <b>Region</b> |
|---------------|------------|-----------------|------------------|---------------|
| XP03GO        | chr9       | 123035315       | RABGAP1          | exonic        |
| XP06GO_1      | chr9       | 114930289       | TNFSF8           | exonic        |
| XP06GO_2      | chr1       | 206485306       | IKBKE            | exonic        |
| XP06GO_2      | chr2       | 159858461       | LY75-CD302       | exonic        |
| XP06GO_2      | chr5       | 140365871       | SLC4A9           | exonic        |
| XP06GO_2      | chr7       | 43625598        | STK17A           | exonic        |
| XP06GO_2      | chr9       | 128635413       | WDR34            | exonic        |
| XP06GO_4      | chr16      | 8930336         | USP7             | exonic        |
| XP11GO        | chr19      | 1581509         | MBD3             | exonic        |
| XP11GO        | chr8       | 22692988        | EGR3             | exonic        |
| XP45GO        | chr1       | 116536227       | CD58             | exonic        |
| XP45GO        | chr3       | 32890868        | TRIM71           | exonic        |
| XP45GO        | chr8       | 123025031       | DERL1            | exonic        |
| XP52GO_1      | chr15      | 33662861        | RYR3             | exonic        |
| XP85GO_2      | chr16      | 72122927        | PMFBP1           | exonic        |
| XP85GO_2      | chr9       | 89405550        | SEMA4D           | exonic        |
| XP03GO        | chr11      | 73391889        | RELT             | intronic      |
| XP03GO        | chr12      | 5799706         | ANO2             | intronic      |
| XP03GO        | chr17      | 32157815        | RHOT1            | intronic      |
| XP03GO        | chr2       | 96259884        | TMEM127          | intronic      |
| XP03GO        | chr2       | 114469868       | DPP10            | intronic      |
| XP03GO        | chr20      | 8125823         | PLCB1            | intronic      |
| XP03GO        | chr3       | 42201917        | TRAK1            | intronic      |
| XP03GO        | chr3       | 142566603       | ATR              | intronic      |
| XP03GO        | chr4       | 40797843        | NSUN7            | intronic      |
| XP03GO        | chr4       | 98517880        | TSPAN5           | intronic      |
| XP03GO        | chr4       | 188107213       | TRIML2           | intronic      |
| XP03GO        | chr5       | 87281071        | RASA1            | intronic      |
| XP03GO        | chr5       | 142977287       | ARHGAP26         | intronic      |
| XP06GO_1      | chr12      | 62302147        | USP15            | intronic      |
| XP06GO_1      | chr17      | 34151550        | ASIC2            | intronic      |
| XP06GO_1      | chr3       | 14842879        | FGD5             | intronic      |
| XP06GO_1      | chr3       | 180986068       | DNAJC19          | intronic      |
| XP06GO_1      | chr3       | 186100783       | ETV5             | intronic      |
| XP06GO_1      | chr5       | 11629149        | CTNND2           | intronic      |
| XP06GO_1      | chr8       | 47677159        | SPIDR            | intronic      |
| XP06GO_1      | chr8       | 101739598       | NCALD            | intronic      |
| XP06GO_1      | chr8       | 133055875       | TG               | intronic      |
| XP06GO_2      | chr1       | 111959485       | KCND3            | intronic      |
| XP06GO_2      | chr12      | 343209          | KDM5A            | intronic      |
| XP06GO_2      | chr12      | 106594694       | RFX4             | intronic      |

|          |       |           |          |          |
|----------|-------|-----------|----------|----------|
| XP06GO_2 | chr2  | 23972787  | UBXN2A   | intronic |
| XP06GO_2 | chr21 | 29297506  | BACH1    | intronic |
| XP06GO_2 | chr3  | 12829439  | CAND2    | intronic |
| XP06GO_2 | chr3  | 48683547  | NCKIPSD  | intronic |
| XP06GO_2 | chr4  | 99413345  | ADH7     | intronic |
| XP06GO_2 | chr5  | 39115382  | FYB      | intronic |
| XP06GO_2 | chr6  | 6193235   | F13A1    | intronic |
| XP06GO_2 | chr6  | 108589443 | FOXO3    | intronic |
| XP06GO_4 | chr1  | 22729253  | EPHB2    | intronic |
| XP06GO_4 | chr1  | 201303808 | PKP1     | intronic |
| XP06GO_4 | chr2  | 223908560 | WDFY1    | intronic |
| XP11GO   | chr1  | 176028861 | RFWD2    | intronic |
| XP11GO   | chr16 | 57100779  | CPNE2    | intronic |
| XP11GO   | chr16 | 68569361  | ZFP90    | intronic |
| XP11GO   | chr17 | 11328943  | SHISA6   | intronic |
| XP11GO   | chr17 | 81957100  | NOTUM    | intronic |
| XP11GO   | chr18 | 7619420   | PTPRM    | intronic |
| XP11GO   | chr19 | 52308189  | ZNF480   | intronic |
| XP11GO   | chr2  | 65092929  | RAB1A    | intronic |
| XP11GO   | chr22 | 30952155  | MORC2    | intronic |
| XP11GO   | chr3  | 13367614  | NUP210   | intronic |
| XP11GO   | chr4  | 6545462   | PPP2R2C  | intronic |
| XP11GO   | chr4  | 31026179  | PCDH7    | intronic |
| XP11GO   | chr4  | 44258565  | KCTD8    | intronic |
| XP11GO   | chr4  | 48809166  | OCIAD1   | intronic |
| XP11GO   | chr4  | 109820286 | GAR1     | intronic |
| XP11GO   | chr7  | 75951606  | POR      | intronic |
| XP11GO   | chr8  | 109478786 | PKHD1L1  | intronic |
| XP45GO   | chr1  | 59552137  | FGGY     | intronic |
| XP45GO   | chr13 | 113727350 | GRK1     | intronic |
| XP45GO   | chr2  | 178495137 | PLEKHA3  | intronic |
| XP45GO   | chr22 | 32793639  | SYN3     | intronic |
| XP45GO   | chr3  | 173636930 | NLGN1    | intronic |
| XP45GO   | chr4  | 168482442 | DDX60L   | intronic |
| XP45GO   | chr4  | 185251360 | SNX25    | intronic |
| XP52GO_1 | chr1  | 175342356 | TNR      | intronic |
| XP52GO_1 | chr10 | 45578006  | MARCH8   | intronic |
| XP52GO_1 | chr12 | 128466525 | TMEM132C | intronic |
| XP52GO_1 | chr14 | 72143500  | RGS6     | intronic |
| XP52GO_1 | chr17 | 10722502  | TMEM220  | intronic |
| XP52GO_1 | chr2  | 31985611  | MEMO1    | intronic |
| XP52GO_1 | chr2  | 203522644 | RAPH1    | intronic |
| XP52GO_1 | chr6  | 124364609 | NKAIN2   | intronic |
| XP52GO_1 | chr6  | 167871481 | MLLT4    | intronic |

|          |       |           |          |          |
|----------|-------|-----------|----------|----------|
| XP52GO_2 | chr7  | 131251214 | MKLN1    | intronic |
| XP85GO_1 | chr10 | 99365030  | CNNM1    | intronic |
| XP85GO_1 | chr11 | 74699711  | CHRD2    | intronic |
| XP85GO_1 | chr15 | 40258743  | PAK6     | intronic |
| XP85GO_1 | chr15 | 55565856  | PYGO1    | intronic |
| XP85GO_1 | chr19 | 46607282  | CALM3    | intronic |
| XP85GO_1 | chr22 | 44887892  | PHF21B   | intronic |
| XP85GO_1 | chr3  | 177037638 | TBL1XR1  | intronic |
| XP85GO_1 | chr6  | 150811672 | PLEKHG1  | intronic |
| XP85GO_2 | chr1  | 114738217 | CSDE1    | intronic |
| XP85GO_2 | chr1  | 161282685 | PCP4L1   | intronic |
| XP85GO_2 | chr11 | 64599164  | SLC22A12 | intronic |
| XP85GO_2 | chr17 | 6108894   | WSCD1    | intronic |
| XP85GO_2 | chr17 | 57424738  | MSI2     | intronic |
| XP85GO_2 | chr19 | 17555979  | COLGALT1 | intronic |
| XP85GO_2 | chr2  | 45823048  | PRKCE    | intronic |
| XP85GO_2 | chr2  | 143674834 | ARHGAP15 | intronic |
| XP85GO_2 | chr2  | 159189792 | TANC1    | intronic |
| XP85GO_2 | chr22 | 26623361  | CRYBA4   | intronic |
| XP85GO_2 | chr5  | 123001489 | SNX24    | intronic |
| XP85GO_2 | chr7  | 151395256 | WDR86    | intronic |
| XP85GO_2 | chr8  | 50082791  | SNTG1    | intronic |
| XP85GO_2 | chr8  | 62314115  | NKAIN3   | intronic |

---

Supplementary Table 9

| EntrezID  | Gene symbol   | Mutation count | ChrmLoc start | ChrmLoc end |
|-----------|---------------|----------------|---------------|-------------|
| 100131827 | ZNF717        | 150            | -75729960     | -75785549   |
|           | 996 CDC27     | 82             | -47117702     | -47189295   |
|           | 7273 TTN      | 80             | -178525990    | -178807423  |
|           | 94025 MUC16   | 41             | -8848843      | -8981342    |
|           | 3321 IGSF3    | 35             | -116574407    | -116667733  |
|           | 5042 PABPC3   | 34             | 25096135      | 25099254    |
| 154664    | ABCA13        | 26             | 48171457      | 48647497    |
| 259293    | TAS2R30       | 25             | -11133284     | -11134244   |
| 150483    | TEKT4         | 25             | 94871429      | 94876823    |
|           | 8481 OFD1     | 25             | 13734712      | 13769353    |
|           | 54768 HYDIN   | 22             | 0             | -93427      |
| 643677    | CCDC168       | 22             | -102729366    | -102759072  |
| 129446    | XIRP2         | 22             | 166888479     | 167259751   |
|           | 84059 ADGRV1  | 22             | 90558796      | 91164437    |
| 387893    | KMT5A         | 21             | 123384131     | 123409353   |
| 57730     | ANKRD36B      | 19             | -97504797     | -97589965   |
|           | 1767 DNAH5    | 19             | -13690328     | -13944688   |
|           | 1488 CTBP2    | 18             | -124984316    | -125006018  |
|           | 54798 DCHS2   | 17             | -154231741    | -154491799  |
|           | 7399 USH2A    | 17             | -216173947    | -216423448  |
|           | 23345 SYNE1   | 17             | -152121683    | -152636851  |
|           | 338 APOB      | 16             | -21001428     | -21044073   |
| 401024    | FSIP2         | 16             | 185738803     | 185833290   |
| 100288801 | FRG2C         | 15             | 75664190      | 75667217    |
|           | 4585 MUC4     | 14             | 16276         | 47963       |
| 114788    | CSMD3         | 14             | -112222929    | -113377152  |
|           | 93035 PKHD1L1 | 14             | 109362460     | 109537207   |
|           | 10106 CTDSP2  | 14             | -57819926     | -57846729   |
| 158471    | PRUNE2        | 13             | -76611375     | -76906087   |
|           | 27445 PCLO    | 13             | -82820477     | -83162884   |
|           | 53353 LRP1B   | 13             | -140231422    | -142131016  |
|           | 6262 RYR2     | 13             | 237042183     | 237833988   |
|           | 1286 COL4A4   | 13             | -227002715    | -227164205  |
| 25832     | NBPF14        | 12             | -148531384    | -148595717  |
|           | 1285 COL4A3   | 12             | 227164623     | 227314792   |
| 144535    | CFAP54        | 12             | 96489576      | 96875555    |
|           | 79776 ZFHX4   | 12             | 76681246      | 76867281    |
|           | 6101 RP1      | 12             | 54616095      | 54630834    |
|           | 6708 SPTA1    | 12             | -158610703    | -158686715  |
|           | 6263 RYR3     | 12             | 33310966      | 33866121    |
|           | 6323 SCN1A    | 11             | -165984640    | -166128020  |

|                  |    |            |            |
|------------------|----|------------|------------|
| 340990 OTOG      | 11 | 17547258   | 17646044   |
| 138474 TAF1L     | 11 | -32629453  | -32635669  |
| 728378 POTEF     | 11 | -130073534 | -130129222 |
| 4588 MUC6        | 11 | -1012822   | -1036718   |
| 2483 FRG1        | 11 | 189940871  | 189963191  |
| 80309 SPHKAP     | 11 | -227979953 | -228181645 |
| 221981 THSD7A    | 10 | -11370364  | -11832198  |
| 169044 COL22A1   | 10 | -138588234 | -138914041 |
| 2678 GGT1        | 10 | 24583749   | 24629005   |
| 64478 CSMD1      | 10 | -2935360   | -4994914   |
| 139378 ADGRG4    | 10 | 136300962  | 136416890  |
| 285175 UNC80     | 10 | 209771831  | 209999295  |
| 58508 KMT2C      | 10 | -152134924 | -152436003 |
| 286464 CFAP47    | 10 | 35919733   | 35990150   |
| 8701 DNAH11      | 10 | 21543038   | 21901839   |
| 8029 CUBN        | 9  | -16823965  | -17129811  |
| 9177 HTR3B       | 9  | 113908840  | 113946561  |
| 55870 ASH1L      | 9  | -155335267 | -155562803 |
| 319089 TTC6      | 9  | 37772382   | 37842717   |
| 389763 SPATA31D1 | 9  | 81988771   | 81995253   |
| 256076 COL6A5    | 9  | 130345515  | 130484846  |
| 388697 HRNR      | 9  | -152212075 | -152224193 |
| 56171 DNAH7      | 9  | -195737702 | -196068837 |
| 375248 ANKRD36   | 9  | 97113152   | 97264520   |
| 4036 LRP2        | 9  | -169127108 | -169362534 |
| 1769 DNAH8       | 9  | 38715310   | 39030792   |
| 91074 ANKRD30A   | 9  | 37125856   | 37232567   |
| 79026 AHNAK      | 9  | -62515901  | -62546806  |
| 4619 MYH1        | 8  | -10492309  | -10518542  |
| 317754 POTES     | 8  | 13609776   | 13645823   |
| 1755 DMBT1       | 8  | 122560753  | 122643736  |
| 56154 TEX15      | 8  | -30831543  | -30913008  |
| 56776 FMN2       | 8  | 240091882  | 240475185  |
| 287 ANK2         | 8  | 112860986  | 113383740  |
| 2260 FLG         | 8  | -38411137  | -38467845  |
| 1281 COL3A1      | 8  | 188974372  | 189012746  |
| 5649 RELN        | 8  | -103471783 | -103989516 |
| 8913 CACNA1G     | 8  | 50560714   | 50627471   |
| 2977 GUCY1A2     | 8  | -106674018 | -107018476 |
| 5314 PKHD1       | 8  | -51720848  | -52087613  |
| 5789 PTPRD       | 8  | -8314245   | -10613002  |
| 26047 CNTNAP2    | 8  | 2412       | 204591     |
| 140766 ADAMTS14  | 8  | 70672505   | 70762439   |
| 91156 IGFN1      | 8  | 201190823  | 201228952  |

|                 |   |            |            |
|-----------------|---|------------|------------|
| 79747 ADGB      | 8 | 146598971  | 146815461  |
| 8516 ITGA8      | 8 | -15513948  | -15720335  |
| 9353 SLIT2      | 8 | 20251904   | 20620561   |
| 7204 TRIO       | 7 | 14143341   | 14510204   |
| 22915 MMRN1     | 7 | 89894853   | 89954610   |
| 140803 TRPM6    | 7 | -74722494  | -74887347  |
| 3791 KDR        | 7 | -55078480  | -55125595  |
| 6299 SALL1      | 7 | -51135974  | -51150597  |
| 60676 PAPPA2    | 7 | 176463174  | 176691205  |
| 5334 PLCL1      | 7 | 197804592  | 198149863  |
| 773 CACNA1A     | 7 | -13206442  | -13506479  |
| 114805 GALNT13  | 7 | 153871921  | 154454177  |
| 65217 PCDH15    | 7 | -53821098  | -54801231  |
| 131873 COL6A6   | 7 | 130560333  | 130678137  |
| 131544 CRYBG3   | 7 | 97822010   | 97944984   |
| 8972 MGAM       | 7 | 410        | 68627      |
| 6261 RYR1       | 7 | 38433690   | 38587564   |
| 463 ZFH3        | 7 | -72782886  | -73059021  |
| 4052 LTBP1      | 7 | 33134595   | 33399508   |
| 57705 WDFY4     | 7 | 48685462   | 48982956   |
| 221806 VWDE     | 7 | -12330884  | -12403941  |
| 10763 NES       | 7 | -156668762 | -156677407 |
| 1129 CHR2       | 7 | 136869245  | 137020213  |
| 2153 F5         | 7 | -169511950 | -169586481 |
| 577 ADGRB3      | 7 | 68635281   | 69389506   |
| 83872 HMCN1     | 7 | 185734390  | 186190949  |
| 84239 ATP13A4   | 7 | -193398966 | -193554895 |
| 6332 SCN7A      | 7 | -166403572 | -166486971 |
| 120114 FAT3     | 7 | 92224817   | 92896473   |
| 3802 KIR2DL3    | 7 | 71370      | 85919      |
| 55567 DNAH3     | 7 | -20933110  | -21159441  |
| 545 ATR         | 7 | -142449234 | -142578733 |
| 26278 SACS      | 7 | -23328830  | -23375508  |
| 53904 MYO3A     | 7 | 25934228   | 26023488   |
| 79799 UGT2A3    | 7 | -68928463  | -68951804  |
| 2200 FBN1       | 7 | -48408312  | -48645709  |
| 2913 GRM3       | 7 | 86643913   | 86864876   |
| 5800 PTPRO      | 7 | 15546610   | 15598331   |
| 168090 C6orf118 | 6 | -165279663 | -165309605 |
| 284217 LAMA1    | 6 | -6941741   | -7117797   |
| 79633 FAT4      | 6 | 125314954  | 125492932  |
| 6098 ROS1       | 6 | -117287352 | -117425942 |
| 23198 PSME4     | 6 | -53864068  | -53970993  |
| 344148 NCKAP5   | 6 | -132671789 | -133568463 |

|                 |   |            |            |
|-----------------|---|------------|------------|
| 56131 PCDHB4    | 6 | 141121817  | 141125621  |
| 8671 SLC4A4     | 6 | 71339019   | 71572083   |
| 9381 OTOF       | 6 | -26457202  | -26478124  |
| 121256 TMEM132D | 6 | -129071725 | -129904025 |
| 4626 MYH8       | 6 | -10390322  | -10421950  |
| 26033 ATRNL1    | 6 | 115093364  | 115171369  |
| 26166 RGS22     | 6 | -99960935  | -100105626 |
| 23338 JADE2     | 6 | 134525669  | 134583227  |
| 8499 PPFIA2     | 6 | -81257974  | -81598371  |
| 5979 RET        | 6 | 43104731   | 43127614   |
| 55636 CHD7      | 6 | 60741258   | 60868027   |
| 727897 MUC5B    | 6 | 1223065    | 1262172    |
| 84700 MYO18B    | 6 | 25742187   | 26031045   |
| 23524 SRRM2     | 6 | 2752637    | 2771412    |
| 1770 DNAH9      | 6 | 11882901   | 11969748   |
| 1496 CTNNA2     | 6 | 79523182   | 80648863   |
| 6328 SCN3A      | 6 | -165087525 | -165204050 |
| 155038 GIMAP8   | 6 | 150450629  | 150479393  |
| 84627 ZNF469    | 6 | 88382958   | 88440751   |
| 1278 COL1A2     | 6 | 94394894   | 94431227   |
| 730 C7          | 6 | 40909496   | 40984643   |
| 57683 ZDBF2     | 6 | 388647     | 428064     |
| 84181 CHD6      | 6 | -41402082  | -41618377  |
| 375337 TOPAZ1   | 6 | 44241885   | 44332098   |
| 83889 WDR87     | 6 | -37884822  | -37906594  |
| 79987 SVEP1     | 6 | -110365248 | -110579741 |
| 219578 ZNF804B  | 6 | 88759699   | 89338528   |
| 403273 OR5H14   | 6 | 98149385   | 98150318   |
| 6326 SCN2A      | 6 | 165294054  | 165392304  |
| 4308 TRPM1      | 6 | -3286820   | -3447037   |
| 8989 TRPA1      | 6 | -72021249  | -72075584  |
| 5788 PTPRC      | 6 | 198639039  | 198695171  |
| 2066 ERBB4      | 6 | -211375716 | -212538802 |
| 113146 AHNAK2   | 6 | -104937252 | -104970507 |
| 1010 CDH12      | 6 | -21750865  | -22213800  |
| 146754 DNAH2    | 6 | 7717743    | 7833711    |
| 51725 FBXO40    | 6 | 121593378  | 121630294  |
| 8021 NUP214     | 6 | 131190138  | 131234663  |
| 400986 ANKRD36C | 6 | -95848931  | -95991824  |
| 85445 CNTNAP4   | 6 | 76277400   | 76560755   |
| 55187 VPS13D    | 6 | 12230029   | 12512046   |
| 9113 LATS1      | 6 | -149658152 | -149718101 |
| 5801 PTPRQ      | 6 | -70638079  | -70920738  |
| 2042 EPHA3      | 6 | 89107620   | 89400345   |



|                  |   |            |            |
|------------------|---|------------|------------|
| 140453 MUC17     | 6 | 101020080  | 101058859  |
| 286234 SPATA31E1 | 6 | 87882876   | 87888902   |
| 50939 IMPG2      | 6 | -101222545 | -101320575 |
| 6335 SCN9A       | 6 | -166195186 | -166375987 |
| 3339 HSPG2       | 6 | -21822243  | -21937310  |
| 1131 CHR3        | 6 | 239386567  | 239915449  |
| 4625 MYH7        | 6 | -23412739  | -23435660  |
| 729 C6           | 6 | -41142145  | -41261469  |
| 7099 TLR4        | 6 | 117704402  | 117724735  |
| 93034 NT5C1B     | 5 | -18562870  | -18589569  |
| 5144 PDE4D       | 5 | -58969040  | -59587625  |
| 5243 ABCB1       | 5 | -87503016  | -87600884  |
| 231 AR           | 5 | -134442349 | -134459239 |
| 2565 GABRG1      | 5 | -46035769  | -46124054  |
| 139105 BEND2     | 5 | -18162930  | -18220886  |
| 120892 LRRK2     | 5 | 40224996   | 40369284   |
| 1756 DMD         | 5 | -31119225  | -31266954  |
| 11148 HHLA2      | 5 | 108296489  | 108378284  |
| 144568 A2ML1     | 5 | 8822620    | 8876787    |
| 84075 FSCB       | 5 | -44504150  | -44507283  |
| 3681 ITGAD       | 5 | 31393334   | 31426505   |
| 386674 KRTAP10-6 | 5 | -44591267  | -44592505  |
| 65125 WNK1       | 5 | 752578     | 911452     |
| 440279 UNC13C    | 5 | 53978440   | 54633439   |
| 221061 FAM171A1  | 5 | -15211644  | -15371289  |
| 1310 COL19A1     | 5 | 69866555   | 70212467   |
| 1630 DCC         | 5 | 52340196   | 53535898   |
| 56126 PCDHB10    | 5 | 141192352  | 141195647  |
| 2044 EPHA5       | 5 | -65319566  | -65670489  |
| 9378 NRXN1       | 5 | -49918504  | -51032536  |
| 1287 COL4A5      | 5 | 108439837  | 108697545  |
| 1778 DYNC1H1     | 5 | 101964572  | 102056443  |
| 114784 CSMD2     | 5 | -33513997  | -34165230  |
| 64072 CDH23      | 5 | 71811882   | 71815947   |
| 2335 FN1         | 5 | -215360864 | -215436068 |
| 10178 TENM1      | 5 | -124375905 | -124963817 |
| 282763 OR51B5    | 5 | -5342513   | -5505652   |
| 5803 PTPRZ1      | 5 | 121873160  | 122062036  |
| 2904 GRIN2B      | 5 | -13537336  | -13981602  |
| 6546 SLC8A1      | 5 | -40097269  | -40452090  |
| 57493 HEG1       | 5 | -124965709 | -125055997 |
| 8924 HERC2       | 5 | 22494850   | 22579725   |
| 1306 COL15A1     | 5 | 98943906   | 99070787   |
| 2915 GRM5        | 5 | -88504642  | -89063659  |

|                 |   |            |            |
|-----------------|---|------------|------------|
| 1261 CNGA3      | 5 | 98346455   | 98398601   |
| 10902 BRD8      | 5 | -138156883 | -138178669 |
| 653489 RGPD3    | 5 | -106403405 | -106468413 |
| 83417 FCRL4     | 5 | -157573747 | -157598085 |
| 1539 CYLC2      | 5 | 102995332  | 103018488  |
| 1293 COL6A3     | 5 | -237324011 | -237414207 |
| 57578 UNC79     | 5 | 447743     | 822438     |
| 22839 DLGAP4    | 5 | 36461467   | 36528633   |
| 26960 NBEA      | 5 | 35476808   | 35672736   |
| 51196 PLCE1     | 5 | 93993930   | 94332823   |
| 23074 UHRF1BP1L | 5 | -100069907 | -100142874 |
| 403274 OR5H15   | 5 | 98168699   | 98169641   |
| 55083 KIF26B    | 5 | 245154984  | 245709432  |
| 84072 HORMAD1   | 5 | -150698059 | -150720895 |
| 202333 CMYA5    | 5 | 79689835   | 79800221   |
| 79674 VEPH1     | 5 | -157259742 | -157499656 |
| 255631 COL24A1  | 5 | -85729232  | -86156471  |
| 2157 F8         | 5 | -154835792 | -155022723 |
| 81792 ADAMTS12  | 5 | -33751195  | -33891990  |
| 83893 SPATA16   | 5 | -172889356 | -173141235 |
| 8470 SORBS2     | 5 | -185585443 | -185775854 |
| 147658 ZNF534   | 5 | 52429147   | 52452309   |
| 23352 UBR4      | 5 | -19074510  | -19210266  |
| 9919 SEC16A     | 5 | -136440104 | -136483040 |
| 131149 OTOL1    | 5 | 161496807  | 161503942  |
| 92949 ADAMTSL1  | 5 | 18474152   | 18684954   |
| 26053 AUTS2     | 5 | 69598474   | 70793506   |
| 1826 DSCAM      | 5 | -40010998  | -40847158  |
| 221037 JMJD1C   | 5 | -63167220  | -63269223  |
| 2195 FAT1       | 5 | -186587793 | -186723856 |
| 344905 ATP13A5  | 5 | -193274788 | -193378753 |
| 256714 MAP7D2   | 5 | -20006712  | -20116907  |
| 4928 NUP98      | 5 | -3675018   | -3797554   |
| 114548 NLRP3    | 5 | 247416172  | 247448817  |
| 346007 EYS      | 5 | -65334912  | -65579804  |
| 126859 AXDND1   | 5 | 179366043  | 179554735  |
| 6476 SI         | 5 | -164978897 | -165078496 |
| 2318 FLNC       | 5 | 128830405  | 128859272  |
| 121364 OR10A7   | 5 | 55221024   | 55221975   |
| 80731 THSD7B    | 5 | 136765544  | 137677718  |
| 84433 CARD11    | 5 | -2906141   | -3043867   |
| 2903 GRIN2A     | 5 | -9753407   | -10182908  |
| 11141 IL1RAPL1  | 5 | 28587445   | 29956713   |
| 56164 STK31     | 5 | 23710218   | 23832511   |

|                  |   |    |            |            |
|------------------|---|----|------------|------------|
| 10071 MUC12      | 5 |    | 100969622  | 101018949  |
| 728747 ANKRD20A4 | 5 | NA | NA         |            |
| 4018 LPA         | 5 |    | -160531481 | -160664275 |
| 22998 LIMCH1     | 5 |    | 41360806   | 41700044   |
| 8925 HERC1       | 5 |    | -63608617  | -63833948  |
| 3075 CFH         | 5 |    | 196652042  | 196747504  |
| 1302 COL11A2     | 5 |    | -4357097   | -4386870   |
| 6547 SLC8A3      | 5 |    | -70044214  | -70188951  |
| 1612 DAPK1       | 5 |    | 87498534   | 87708634   |
| 9024 BRSK2       | 5 |    | 1389933    | 1462689    |
| 1280 COL2A1      | 5 |    | -47972966  | -48004476  |
| 56112 PCDHGA3    | 5 |    | 141343828  | 141512973  |
| 477 ATP1A2       | 5 |    | 160115758  | 160143584  |
| 5651 TMPRSS15    | 5 |    | -18269115  | -18403785  |
| 27145 FILIP1     | 5 |    | -75456389  | -75493800  |
| 2243 FGA         | 5 |    | -154583125 | -154590742 |
| 23230 VPS13A     | 5 |    | 77177444   | 77385190   |
| 114795 TMEM132B  | 5 |    | 125326615  | 125662377  |
| 1657 DMXL1       | 5 |    | 119071054  | 119249129  |
| 65220 NADK       | 5 |    | -1751231   | -1758642   |
| 25834 MGAT4C     | 5 |    | -85973293  | -86256391  |
| 686 BTD          | 5 |    | 15601744   | 15653714   |
| 23165 NUP205     | 5 |    | 135557916  | 135648751  |
| 1008 CDH10       | 5 |    | -24487099  | -24644978  |
| 2070 EYA4        | 5 |    | 133241356  | 133532120  |
| 55911 APOBR      | 5 |    | 28494642   | 28498964   |
| 8085 KMT2D       | 5 |    | -49018977  | -49060794  |
| 10847 SRCAP      | 5 |    | 30699170   | 30741409   |
| 57519 STARD9     | 5 |    | 42575605   | 42720998   |
| 23499 MACF1      | 5 |    | 39084166   | 39487138   |
| 491 ATP2B2       | 5 |    | -10324022  | -10505586  |
| 64116 SLC39A8    | 5 |    | -102261663 | -102324312 |
| 4647 MYO7A       | 5 |    | 77128245   | 77215241   |
| 4978 OPCML       | 5 |    | -132414664 | -132943637 |
| 57569 ARHGAP20   | 5 |    | -110577042 | -110713189 |
| 81442 OR6N2      | 5 |    | -158776681 | -158777635 |
| 29951 PDZRN4     | 5 |    | 41188319   | 41574745   |
| 340527 NHSL2     | 5 |    | 71911087   | 72143574   |
| 9734 HDAC9       | 5 |    | 18086824   | 18668843   |
| 7776 ZNF236      | 5 |    | 76823759   | 76972899   |

---

Supplementary Table 10

| EntrezID | Gene symbol | Mutation count | ChrmLoc start | ChrmLoc end |
|----------|-------------|----------------|---------------|-------------|
| 94025    | MUC16       | 41             | -8848843      | -8981342    |
| 114788   | CSMD3       | 14             | -112222929    | -113377152  |
| 4585     | MUC4        | 14             | 16276         | 47963       |
| 53353    | LRP1B       | 13             | -140231422    | -142131016  |
| 58508    | KMT2C       | 10             | -152134924    | -152436003  |
| 26047    | CNTNAP2     | 8              | 2412          | 204591      |
| 5789     | PTPRD       | 8              | -8314245      | -10613002   |
| 1281     | COL3A1      | 8              | 188974372     | 189012746   |
| 2913     | GRM3        | 7              | 86643913      | 86864876    |
| 3791     | KDR         | 7              | -55078480     | -55125595   |
| 120114   | FAT3        | 7              | 92224817      | 92896473    |
| 463      | ZFH3        | 7              | -72782886     | -73059021   |
| 545      | ATR         | 7              | -142449234    | -142578733  |
| 2066     | ERBB4       | 6              | -211375716    | -212538802  |
| 8021     | NUP214      | 6              | 131190138     | 131234663   |
| 5979     | RET         | 6              | 43104731      | 43127614    |
| 6098     | ROS1        | 6              | -117287352    | -117425942  |
| 2042     | EPHA3       | 6              | 89107620      | 89400345    |
| 79633    | FAT4        | 6              | 125314954     | 125492932   |
| 9113     | LATS1       | 6              | -149658152    | -149718101  |
| 5788     | PTPRC       | 6              | 198639039     | 198695171   |
| 1496     | CTNNA2      | 6              | 79523182      | 80648863    |
| 83417    | FCRL4       | 5              | -157573747    | -157598085  |
| 2903     | GRIN2A      | 5              | -9753407      | -10182908   |
| 1630     | DCC         | 5              | 52340196      | 53535898    |
| 1280     | COL2A1      | 5              | -47972966     | -48004476   |
| 8085     | KMT2D       | 5              | -49018977     | -49060794   |
| 231      | AR          | 5              | -134442349    | -134459239  |
| 653489   | RGPD3       | 5              | -106403405    | -106468413  |
| 2195     | FAT1        | 5              | -186587793    | -186723856  |
| 26960    | NBEA        | 5              | 35476808      | 35672736    |
| 84433    | CARD11      | 5              | -2906141      | -3043867    |
| 4928     | NUP98       | 5              | -3675018      | -3797554    |
| 1008     | CDH10       | 5              | -24487099     | -24644978   |
| 2033     | EP300       | 4              | 41092591      | 41180077    |
| 80312    | TET1        | 4              | 68560336      | 68694485    |
| 7015     | TERT        | 4              | -1253147      | -1295068    |
| 5783     | PTPN13      | 4              | 86594314      | 86815159    |
| 4214     | MAP3K1      | 4              | 56815548      | 56896151    |
| 23365    | ARHGEF12    | 4              | 120385326     | 120489937   |
| 6491     | STIL        | 4              | -47250138     | -47314147   |

|                |   |            |            |
|----------------|---|------------|------------|
| 57448 BIRC6    | 4 | 32357027   | 32618898   |
| 23261 CAMTA1   | 4 | 6785323    | 6888201    |
| 4853 NOTCH2    | 4 | -119935112 | -120069703 |
| 2045 EPHA7     | 4 | -93409653  | -93419559  |
| 675 BRCA2      | 4 | 32315507   | 32400268   |
| 57670 KIAA1549 | 4 | -138831380 | -138981389 |
| 283149 BCL9L   | 3 | -118896135 | -118910542 |
| 23476 BRD4     | 3 | -15247035  | -15280451  |
| 10320 IKZF1    | 3 | 50304715   | 50405100   |
| 80243 PREX2    | 3 | 67952045   | 68106009   |
| 9611 NCOR1     | 3 | -16091569  | -16194639  |
| 6495 SIX1      | 3 | -60643432  | -60649477  |
| 492 ATP2B3     | 3 | 153536121  | 153582929  |
| 6424 SFRP4     | 3 | -37905932  | -37916817  |
| 2132 EXT2      | 3 | 44095677   | 44251961   |
| 3702 ITK       | 3 | 157180839  | 157255185  |
| 168975 CNBD1   | 3 | 86866414   | 87382859   |
| 23067 SETD1B   | 3 | 121804008  | 121832656  |
| 7409 VAV1      | 3 | 6772707    | 6857361    |
| 472 ATM        | 3 | 108223066  | 108369102  |
| 6756 SSX1      | 3 | 48255391   | 48267444   |
| 4297 KMT2A     | 3 | 118436491  | 118526832  |
| 2177 FANCD2    | 3 | 10026436   | 10099343   |
| 25925 ZNF521   | 3 | -25061923  | -25352166  |
| 4627 MYH9      | 3 | -36281279  | -36387967  |
| 5787 PTPRB     | 3 | -70515869  | -70637429  |
| 5077 PAX3      | 3 | -222293634 | -222298998 |
| 2065 ERBB3     | 3 | 56080107   | 56085617   |
| 1788 DNMT3A    | 3 | -25281451  | -25341925  |
| 57674 RNF213   | 3 | 80260851   | 80321462   |
| 2316 FLNA      | 3 | -154348531 | -154374638 |
| 1015 CDH17     | 3 | -94127161  | -94217278  |
| 2322 FLT3      | 3 | -28003273  | -28100576  |
| 10142 AKAP9    | 3 | 91940861   | 92110673   |
| 8241 RBM10     | 3 | 47145220   | 47186813   |
| 63976 PRDM16   | 3 | 3069202    | 3438621    |
| 867 CBL        | 3 | 119206338  | 119308149  |
| 3718 JAK3      | 3 | -17824783  | -17847982  |
| 9582 APOBEC3B  | 2 | 38982346   | 38992779   |
| 9203 ZMYM3     | 2 | -71249204  | -71254649  |
| 6760 SS18      | 2 | -26016252  | -26090647  |
| 6446 SGK1      | 2 | -134169255 | -134174866 |
| 5604 MAP2K1    | 2 | 66386911   | 66491544   |
| 668 FOXL2      | 2 | -138944223 | -138947137 |

|              |   |            |            |
|--------------|---|------------|------------|
| 9612 NCOR2   | 2 | -124324414 | -124567612 |
| 2778 GNAS    | 2 | 58839747   | 58911192   |
| 5324 PLAG1   | 2 | -56160908  | -56211273  |
| 2099 ESR1    | 2 | 151805704  | 152103273  |
| 23405 DICER1 | 2 | -95086227  | -95158010  |
| 55728 N4BP2  | 2 | 40056849   | 40158252   |
| 604 BCL6     | 2 | -187721380 | -187736501 |
| 8805 TRIM24  | 2 | 138460258  | 138589996  |
| 26040 SETBP1 | 2 | 44680072   | 44877419   |
| 29102 DROSHA | 2 | -31400494  | -31532093  |
| 54738 FEV    | 2 | -218981086 | -218985184 |
| 6801 STRN    | 2 | -36837697  | -36966536  |
| 8289 ARID1A  | 2 | 26696014   | 26782104   |
| 23085 ERC1   | 2 | 991222     | 1495931    |
| 5395 PMS2    | 2 | -5970925   | -6009049   |
| 5537 PPP6C   | 2 | -125146572 | -125189939 |
| 4791 NFKB2   | 2 | 102394109  | 102402529  |
| 238 ALK      | 2 | -29192773  | -29223900  |
| 2719 GPC3    | 2 | -133535745 | -133985594 |
| 3815 KIT     | 2 | 54657956   | 54740715   |
| 5292 PIM1    | 2 | 37170151   | 37175428   |
| 1277 COL1A1  | 2 | -50184100  | -50201631  |
| 580 BARD1    | 2 | -214725645 | -214809683 |
| 4773 NFATC2  | 2 | -51386962  | -51542719  |
| 29974 A1CF   | 2 | -50799408  | -50885675  |
| 1501 CTNND2  | 2 | -10971840  | -11588917  |
| 6608 SMO     | 2 | 129188632  | 129213544  |
| 54880 BCOR   | 2 | -40051252  | -40177277  |
| 64324 NSD1   | 2 | 177134228  | 177300213  |
| 6926 TBX3    | 2 | -114670254 | -114684175 |
| 5426 POLE    | 2 | -132623761 | -132687342 |
| 8929 PHOX2B  | 2 | -41744081  | -41748725  |
| 2122 MECOM   | 2 | -169083506 | -169663712 |
| 3899 AFF3    | 2 | -99545418  | -100105583 |
| 8295 TRRAP   | 2 | 98878489   | 99013243   |
| 6249 CLIP1   | 2 | -122271430 | -122422669 |
| 1436 CSF1R   | 2 | -150053290 | -150113372 |
| 6000 RGS7    | 2 | -240775513 | -241357230 |
| 4152 PCM1    | 2 | -50266881  | -50281774  |
| 27436 EML4   | 2 | 42169352   | 42332548   |
| 3371 TNC     | 2 | -115019575 | -115118157 |
| 2324 FLT4    | 2 | -180601505 | -180649600 |
| 9098 USP6    | 2 | 5128808    | 5174991    |
| 2064 ERBB2   | 2 | 39700063   | 39728658   |

|               |   |            |            |
|---------------|---|------------|------------|
| 4644 MYO5A    | 2 | -52307283  | -52528880  |
| 65268 WNK2    | 2 | 93184929   | 93320572   |
| 5087 PBX1     | 2 | 164559359  | 164851823  |
| 4436 MSH2     | 2 | 47403066   | 47483228   |
| 6935 ZEB1     | 2 | 31319215   | 31529804   |
| 324 APC       | 2 | 112737884  | 112846239  |
| 8313 AXIN2    | 2 | -65528564  | -65561648  |
| 862 RUNX1T1   | 2 | -91954971  | -92095230  |
| 51059 FAM135B | 2 | -138130022 | -138497730 |
| 3195 TLX1     | 2 | 101131299  | 101137789  |
| 345930 ECT2L  | 2 | 138796110  | 138904070  |
| 5187 PER1     | 2 | -8140471   | -8152404   |
| 57105 CYSLTR2 | 2 | 48653928   | 48711225   |
| 92017 SNX29   | 2 | 11976733   | 12574287   |
| 286 ANK1      | 2 | -41653224  | -41896741  |
| 1387 CREBBP   | 2 | -3725054   | -3880120   |
| 6938 TCF12    | 2 | 57219429   | 57289853   |
| 23013 SPEN    | 2 | 15847706   | 15940456   |
| 3575 IL7R     | 2 | 35856890   | 35879603   |
| 346389 MACC1  | 2 | -20134655  | -20217384  |
| 776 CACNA1D   | 2 | 53494610   | 53813730   |
| 29072 SETD2   | 2 | -47016435  | -47164113  |
| 7486 WRN      | 2 | 31033809   | 31176137   |
| 476 ATP1A1    | 1 | 116383369  | 116404776  |
| 84101 USP44   | 1 | -95516559  | -95548802  |
| 4914 NTRK1    | 1 | 156860878  | 156881850  |
| 4595 MUTYH    | 1 | -45329241  | -45340440  |
| 7175 TPR      | 1 | -186311653 | -186375253 |
| 140885 SIRPA  | 1 | 1895406    | 1940592    |
| 9967 THRAP3   | 1 | 36224442   | 36305356   |
| 10274 STAG1   | 1 | -136336235 | -136752378 |
| 9321 TRIP11   | 1 | -91965990  | -92040059  |
| 1964 EIF1AX   | 1 | -20124524  | -20141838  |
| 85414 SLC45A3 | 1 | -205657850 | -205680509 |
| 4233 MET      | 1 | 116672195  | 116769910  |
| 10721 POLQ    | 1 | -121431430 | -121545988 |
| 7048 TGFBR2   | 1 | 30606600   | 30694141   |
| 51684 SUFU    | 1 | 102503971  | 102633535  |
| 5900 RALGDS   | 1 | -133097721 | -133129401 |
| 64979 BRIP1   | 1 | -1798384   | -1799837   |
| 51592 TRIM33  | 1 | -114392792 | -114511203 |
| 1108 CHD4     | 1 | -6570081   | -6607379   |
| 595 CCND1     | 1 | 69641155   | 69654474   |
| 7994 KAT6A    | 1 | -41942048  | -42051987  |

|        |          |   |            |            |
|--------|----------|---|------------|------------|
| 114825 | PWWP2A   | 1 | -160075884 | -160119450 |
| 4629   | MYH11    | 1 | -1361145   | -1515023   |
| 5450   | POU2AF1  | 1 | -111352255 | -111379275 |
| 2115   | ETV1     | 1 | -13891230  | -13991425  |
| 1616   | DAXX     | 1 | -33318557  | -33323016  |
| 3091   | HIF1A    | 1 | 61695512   | 61748258   |
| 10019  | SH2B3    | 1 | 111434861  | 111451623  |
| 2078   | ERG      | 1 | -38380027  | -38498504  |
| 7253   | TSHR     | 1 | 80955620   | 81108940   |
| 3105   | HLA-A    | 1 | 1144512    | 1289979    |
| 51176  | LEF1     | 1 | -108047544 | -108168956 |
| 3845   | KRAS     | 1 | -25205245  | -25250929  |
| 607    | BCL9     | 1 | 147541500  | 147626214  |
| 6389   | SDHA     | 1 | 218319     | 257082     |
| 5796   | PTPRK    | 1 | -313982    | -869933    |
| 9639   | ARHGEF10 | 1 | 1823925    | 1958641    |
| 641    | BLM      | 1 | 90717345   | 90816166   |
| 3092   | HIP1     | 1 | -75533297  | -75738941  |
| 5156   | PDGFRA   | 1 | 54229292   | 54298245   |
| 3662   | IRF4     | 1 | 391751     | 411443     |
| 11177  | BAZ1A    | 1 | -34752730  | -34875360  |
| 5884   | RAD17    | 1 | 69371034   | 69414801   |
| 7799   | PRDM2    | 1 | 13749414   | 13788081   |
| 8496   | PPFIBP1  | 1 | 27524205   | 27695564   |
| 9968   | MED12    | 1 | 71118595   | 71142449   |
| 2735   | GLI1     | 1 | 57460150   | 57472264   |
| 4913   | NTHL1    | 1 | -2039819   | -2047834   |
| 405    | ARNT     | 1 | -150809713 | -150876599 |
| 8028   | MLLT10   | 1 | 21534171   | 21557185   |
| 653    | BMP5     | 1 | -55753652  | -55875590  |
| 6777   | STAT5B   | 1 | -42199176  | -42276391  |
| 7248   | TSC1     | 1 | -132891348 | -132944616 |
| 3725   | JUN      | 1 | -58780790  | -58784047  |
| 26524  | LATS2    | 1 | -20973035  | -21061586  |
| 2264   | FGFR4    | 1 | 177086914  | 177098144  |
| 7531   | YWHAE    | 1 | -1344274   | -1400222   |
| 27     | ABL2     | 1 | -179099330 | -179229677 |
| 613    | BCR      | 1 | 23180508   | 23318037   |
| 999    | CDH1     | 1 | 68737291   | 68835536   |
| 1656   | DDX6     | 1 | -118747763 | -118791164 |
| 2475   | MTOR     | 1 | -11106534  | -11262551  |
| 4851   | NOTCH1   | 1 | -136494432 | -136546048 |
| 6917   | TCEA1    | 1 | -53966555  | -54022448  |
| 8648   | NCOA1    | 1 | 24584476   | 24770701   |



|                |   |            |            |
|----------------|---|------------|------------|
| 3977 LIFR      | 1 | -38474667  | -38595405  |
| 2006 ELN       | 1 | 74028172   | 74069906   |
| 5093 PCBP1     | 1 | 70087476   | 70089202   |
| 23092 ARHGAP26 | 1 | 142770376  | 143229011  |
| 2308 FOXO1     | 1 | -40555666  | -40666641  |
| 27125 AFF4     | 1 | -132875395 | -132963634 |
| 90827 ZNF479   | 1 | -57119618  | -57139864  |
| 64919 BCL11B   | 1 | -99169287  | -99272197  |
| 3084 NRG1      | 1 | 32548310   | 32728618   |
| 1009 CDH11     | 1 | -64943752  | -65122063  |
| 7128 TNFAIP3   | 1 | 137867258  | 137883312  |
| 2309 FOXO3     | 1 | 108559824  | 108684774  |
| 6605 SMARCE1   | 1 | -40624961  | -40647818  |
| 23157 SEPT6    | 1 | -119615724 | -119693168 |
| 9869 SETDB1    | 1 | 150926362  | 150945320  |
| 4088 SMAD3     | 1 | 67166154   | 67195195   |
| 7403 KDM6A     | 1 | 44873174   | 45112612   |
| 10735 STAG2    | 1 | 123961705  | 124102655  |
| 330 BIRC3      | 1 | 102317483  | 102339403  |
| 1655 DDX5      | 1 | -64498253  | -64506866  |
| 6927 HNF1A     | 1 | 120978542  | 121002511  |
| 2262 GPC5      | 1 | 91398620   | 92867234   |
| 1345 COX6C     | 1 | -99877864  | -99893707  |
| 57492 ARID1B   | 1 | 157036426  | 157210779  |
| 1956 EGFR      | 1 | 55019020   | 55208080   |
| 1500 CTNND1    | 1 | 57761801   | 57819540   |
| 25766 PRPF40B  | 1 | 49623560   | 49644665   |
| 3227 HOXC11    | 1 | 53973125   | 53977643   |
| 2000 ELF4      | 1 | -130063957 | -130110497 |
| 6092 ROBO2     | 1 | 77098011   | 77649963   |
| 2199 FBLN2     | 1 | 13568739   | 13638402   |
| 5925 RB1       | 1 | 48303750   | 48481890   |
| 8218 CLTCL1    | 1 | -19179473  | -19291719  |
| 4610 MYCL      | 1 | -39899611  | -39901917  |
| 57167 SALL4    | 1 | -51782330  | -51802521  |
| 5727 PTCH1     | 1 | -95442979  | -95509266  |
| 3209 HOXA13    | 1 | -27194370  | -27200091  |
| 8243 SMC1A     | 1 | -53374148  | -53422728  |
| 9715 FAM131B   | 1 | -143353399 | -143362713 |
| 4089 SMAD4     | 1 | 51030212   | 51085041   |
| 1662 DDX10     | 1 | 108665068  | 108940926  |
| 6421 SFPQ      | 1 | -35182935  | -35193145  |
| 442444 FAM47C  | 1 | 37008365   | 37011664   |
| 5605 MAP2K2    | 1 | -4090321   | -4124122   |

|        |          |   |            |            |
|--------|----------|---|------------|------------|
| 1639   | DCTN1    | 1 | -74361154  | -74374667  |
| 3572   | IL6ST    | 1 | -55935096  | -55994963  |
| 23305  | ACSL6    | 1 | -131949973 | -132011817 |
| 340578 | DCAF12L2 | 1 | -126163498 | -126166289 |
| 2623   | GATA1    | 1 | 48786589   | 48794310   |
| 10342  | TFG      | 1 | 100709289  | 100748967  |
| 4609   | MYC      | 1 | 127735433  | 127742951  |
| 7454   | WAS      | 1 | 48683798   | 48691426   |
| 54790  | TET2     | 1 | 105146875  | 105279803  |
| 51755  | CDK12    | 1 | 39461485   | 39534565   |
| 27044  | SND1     | 1 | 127652193  | 128092593  |
| 5894   | RAF1     | 1 | -12583600  | -12664117  |
| 3762   | KCNJ5    | 1 | 128891355  | 128921163  |
| 2625   | GATA3    | 1 | 8054687    | 8075198    |
| 4261   | CIITA    | 1 | 10877201   | 10936393   |
| 8493   | PPM1D    | 1 | 60600192   | 60666279   |
| 399    | RHOH     | 1 | 40196906   | 40244764   |
| 54894  | RNF43    | 1 | -58353675  | -58417534  |
| 6657   | SOX2     | 1 | 181711924  | 181714435  |
| 2175   | FANCA    | 1 | -89737548  | -89816647  |
| 11328  | FKBP9    | 1 | 32957403   | 33006931   |
| 7157   | TP53     | 1 | -7668401   | -7687550   |
| 4330   | MN1      | 1 | -27748276  | -27801756  |
| 55422  | ZNF331   | 1 | 53521013   | 53580269   |
| 11200  | CHEK2    | 1 | -28687742  | -28741834  |
| 5903   | RANBP2   | 1 | 108719481  | 108785809  |
| 27086  | FOXP1    | 1 | -70954709  | -71064924  |
| 3936   | LCP1     | 1 | -46125922  | -46182177  |

---

---

**Supplementary Table 22**

---

**Plasma membrane**

---

| <b>ID</b> | <b>Gene symbol</b> | <b>Gene name</b>                                                    |
|-----------|--------------------|---------------------------------------------------------------------|
| 9177      | HTR3B              | 5-hydroxytryptamine receptor 3B                                     |
| 92949     | ADAMTSL1           | ADAMTS like 1                                                       |
| 113146    | AHNAK2             | AHNAK nucleoprotein 2                                               |
| 79026     | AHNAK              | AHNAK nucleoprotein                                                 |
| 154664    | ABCA13             | ATP binding cassette subfamily A member 13                          |
| 5243      | ABCB1              | ATP binding cassette subfamily B member 1                           |
| 84239     | ATP13A4            | ATPase 13A4                                                         |
| 344905    | ATP13A5            | ATPase 13A5                                                         |
| 477       | ATP1A2             | ATPase Na <sup>+</sup> /K <sup>+</sup> transporting subunit alpha 2 |
| 491       | ATP2B2             | ATPase plasma membrane Ca <sup>2+</sup> transporting 2              |
| 114784    | CSMD2              | CUB and Sushi multiple domains 2                                    |
| 114788    | CSMD3              | CUB and Sushi multiple domains 3                                    |
| 1630      | DCC                | DCC netrin 1 receptor                                               |
| 22839     | DLGAP4             | DLG associated protein 4                                            |
| 1826      | DSCAM              | DS cell adhesion molecule                                           |
| 2042      | EPHA3              | EPH receptor A3                                                     |
| 2044      | EPHA5              | EPH receptor A5                                                     |
| 2195      | FAT1               | FAT atypical cadherin 1                                             |
| 120114    | FAT3               | FAT atypical cadherin 3                                             |
| 79633     | FAT4               | FAT atypical cadherin 4                                             |
| 8924      | HERC2              | HECT and RLD domain containing E3 ubiquitin protein ligase 2        |
| 53353     | LRP1B              | LDL receptor related protein 1B                                     |
| 4036      | LRP2               | LDL receptor related protein 2                                      |
| 317754    | POTED              | POTE ankyrin domain family member D                                 |
| 6098      | ROS1               | ROS proto-oncogene 1, receptor tyrosine kinase                      |
| 577       | ADGRB3             | adhesion G protein-coupled receptor B3                              |
| 84059     | ADGRV1             | adhesion G protein-coupled receptor V1                              |
| 287       | ANK2               | ankyrin 2                                                           |
| 55911     | APOBR              | apolipoprotein B receptor                                           |
| 338       | APOB               | apolipoprotein B                                                    |
| 1008      | CDH10              | cadherin 10                                                         |
| 1010      | CDH12              | cadherin 12                                                         |
| 64072     | CDH23              | cadherin related 23                                                 |
| 773       | CACNA1A            | calcium voltage-gated channel subunit alpha1 A                      |
| 8913      | CACNA1G            | calcium voltage-gated channel subunit alpha1 G                      |
| 202333    | CMYA5              | cardiomyopathy associated 5                                         |
| 84433     | CARD11             | caspase recruitment domain family member 11                         |
| 1129      | CHRM2              | cholinergic receptor muscarinic 2                                   |
| 1131      | CHRM3              | cholinergic receptor muscarinic 3                                   |
| 2153      | F5                 | coagulation factor V                                                |
| 2157      | F8                 | coagulation factor VIII                                             |
| 8029      | CUBN               | cubilin                                                             |
| 1261      | CNGA3              | cyclic nucleotide gated channel subunit alpha 3                     |
| 54798     | DCHS2              | dachsous cadherin-related 2                                         |
| 1612      | DAPK1              | death associated protein kinase 1                                   |
| 1756      | DMD                | dystrophin                                                          |
| 2066      | ERBB4              | erb-b2 receptor tyrosine kinase 4                                   |
| 221061    | FAM171A1           | family with sequence similarity 171 member A1                       |
| 2243      | FGA                | fibrinogen alpha chain                                              |

|        |          |                                                                                      |
|--------|----------|--------------------------------------------------------------------------------------|
| 2260   | FGFR1    | fibroblast growth factor receptor 1                                                  |
| 2335   | FN1      | fibronectin 1                                                                        |
| 27145  | FILIP1   | filamin A interacting protein 1                                                      |
| 2318   | FLNC     | filamin C                                                                            |
| 56776  | FMN2     | formin 2                                                                             |
| 2565   | GABRG1   | gamma-aminobutyric acid type A receptor subunit gamma1                               |
| 2678   | GGT1     | gamma-glutamyltransferase 1                                                          |
| 2903   | GRIN2A   | glutamate ionotropic receptor NMDA type subunit 2A                                   |
| 2904   | GRIN2B   | glutamate ionotropic receptor NMDA type subunit 2B                                   |
| 2913   | GRM3     | glutamate metabotropic receptor 3                                                    |
| 2915   | GRM5     | glutamate metabotropic receptor 5                                                    |
| 3339   | HSPG2    | heparan sulfate proteoglycan 2                                                       |
| 8516   | ITGA8    | integrin subunit alpha 8                                                             |
| 3681   | ITGAD    | integrin subunit alpha D                                                             |
| 11141  | IL1RAPL1 | interleukin 1 receptor accessory protein like 1                                      |
| 3802   | KIR2DL1  | killer cell immunoglobulin like receptor, two Ig domains and long cytoplasmic tail 1 |
| 3791   | KDR      | kinase insert domain receptor                                                        |
| 120892 | LRRK2    | leucine rich repeat kinase 2                                                         |
| 8972   | MGAM     | maltase-glucoamylase                                                                 |
| 23499  | MACF1    | microtubule actin crosslinking factor 1                                              |
| 10071  | MUC12    | mucin 12, cell surface associated                                                    |
| 94025  | MUC16    | mucin 16, cell surface associated                                                    |
| 140453 | MUC17    | mucin 17, cell surface associated                                                    |
| 4585   | MUC4     | mucin 4, cell surface associated                                                     |
| 727897 | MUC5B    | mucin 5B, oligomeric mucus/gel-forming                                               |
| 4588   | MUC6     | mucin 6, oligomeric mucus/gel-forming                                                |
| 9378   | NRXN1    | neurexin 1                                                                           |
| 26960  | NBEA     | neurobeachin                                                                         |
| 121364 | OR10A7   | olfactory receptor family 10 subfamily A member 7                                    |
| 403273 | OR5H14   | olfactory receptor family 5 subfamily H member 14                                    |
| 403274 | OR5H15   | olfactory receptor family 5 subfamily H member 15                                    |
| 282763 | OR51B5   | olfactory receptor family 51 subfamily B member 5                                    |
| 81442  | OR6N2    | olfactory receptor family 6 subfamily N member 2                                     |
| 4978   | OPCML    | opioid binding protein/cell adhesion molecule like                                   |
| 5144   | PDE4D    | phosphodiesterase 4D                                                                 |
| 51196  | PLCE1    | phospholipase C epsilon 1                                                            |
| 5334   | inactive | phospholipase C like 1                                                               |
| 5788   | PTPRC    | protein tyrosine phosphatase receptor type C                                         |
| 5789   | PTPRD    | protein tyrosine phosphatase receptor type D                                         |
| 5800   | PTPRO    | protein tyrosine phosphatase receptor type O                                         |
| 5801   | PTPRR    | protein tyrosine phosphatase receptor type R                                         |
| 5803   | PTPRZ1   | protein tyrosine phosphatase receptor type Z1                                        |
| 56112  | PCDHGA3  | protocadherin gamma subfamily A, 3                                                   |
| 65217  | PCDH15   | protocadherin related 15                                                             |
| 5649   | RELN     | reelin                                                                               |
| 5979   | RET      | ret proto-oncogene                                                                   |
| 6261   | RYR1     | ryanodine receptor 1                                                                 |
| 6262   | RYR2     | ryanodine receptor 2                                                                 |
| 6263   | RYR3     | ryanodine receptor 3                                                                 |
| 6323   | SCN1A    | sodium voltage-gated channel alpha subunit 1                                         |
| 6326   | SCN2A    | sodium voltage-gated channel alpha subunit 2                                         |
| 6328   | SCN3A    | sodium voltage-gated channel alpha subunit 3                                         |
| 6335   | SCN9A    | sodium voltage-gated channel alpha subunit 9                                         |
| 64116  | SLC39A8  | solute carrier family 39 member 8                                                    |

|        |         |                                                                  |
|--------|---------|------------------------------------------------------------------|
| 8671   | SLC4A4  | solute carrier family 4 member 4                                 |
| 6546   | SLC8A1  | solute carrier family 8 member A1                                |
| 6547   | SLC8A3  | solute carrier family 8 member A3                                |
| 8470   | SORBS2  | sorbin and SH3 domain containing 2                               |
| 6708   | SPTA1   | spectrin alpha, erythrocytic 1                                   |
| 6476   | SI      | sucrase-isomaltase                                               |
| 259293 | TAS2R30 | taste 2 receptor member 30                                       |
| 10178  | TENM1   | teneurin transmembrane protein 1                                 |
| 221981 | THSD7A  | thrombospondin type 1 domain containing 7A                       |
| 80731  | THSD7B  | thrombospondin type 1 domain containing 7B                       |
| 7273   | TTN     | titin                                                            |
| 7099   | TLR4    | toll like receptor 4                                             |
| 8989   | TRPA1   | transient receptor potential cation channel subfamily A member 1 |
| 4308   | TRPM1   | transient receptor potential cation channel subfamily M member 1 |
| 140803 | TRPM6   | transient receptor potential cation channel subfamily M member 6 |
| 23352  | UBR4    | ubiquitin protein ligase E3 component n-recognin 4               |
| 440279 | UNC13C  | unc-13 homolog C                                                 |
| 57578  | UNC79   | unc-79 homolog, NALCN channel complex subunit                    |
| 285175 | UNC80   | unc-80 homolog, NALCN channel complex subunit                    |
| 79674  | VEPH1   | ventricular zone expressed PH domain containing 1                |

---
